# Supplementary material
Source: PubMed Central journal article supplement (PMC8611862)
Supplement: 40779_2021_354_MOESM1_ESM.pdf [file 40779_2021_354_MOESM1_ESM.pdf]

Table S1 Socio-demographic index values for all estimated CBD 2019 locations, 1990-2011

| Location                                         | 1990  | 1991  | 1992  | 1993  | 1994  | 1995  | 1996  | 1997  | 1998  | 1999  | 2000  | 2001  | 2002  | 2003  | 2004  | 2005  | 2006  | 2007  | 2008  | 2009  | 2010  | 2011  | 2012  | 2013  | 2014  | 2015  | 2016  | 2017  | 2018  | 2019  |
|--------------------------------------------------|-------|-------|-------|-------|-------|-------|-------|-------|-------|-------|-------|-------|-------|-------|-------|-------|-------|-------|-------|-------|-------|-------|-------|-------|-------|-------|-------|-------|-------|-------|
| Global                                           | 0.916 | 0.916 | 0.921 | 0.925 | 0.929 | 0.934 | 0.938 | 0.942 | 0.947 | 0.951 | 0.956 | 0.961 | 0.966 | 0.971 | 0.976 | 0.981 | 0.986 | 0.991 | 0.996 | 1.001 | 1.006 | 1.011 | 1.016 | 1.021 | 1.026 | 1.031 | 1.036 | 1.041 | 1.046 | 1.051 |
| Central Europe, eastern Europe, and central Asia | 0.514 | 0.514 | 0.521 | 0.525 | 0.531 | 0.536 | 0.541 | 0.546 | 0.551 | 0.556 | 0.561 | 0.566 | 0.571 | 0.576 | 0.581 | 0.586 | 0.591 | 0.596 | 0.601 | 0.606 | 0.611 | 0.616 | 0.621 | 0.626 | 0.631 | 0.636 | 0.641 | 0.646 | 0.651 | 0.656 |
| Central Asia                                     | 0.551 | 0.551 | 0.557 | 0.558 | 0.559 | 0.559 | 0.56  | 0.56  | 0.561 | 0.561 | 0.561 | 0.561 | 0.561 | 0.561 | 0.561 | 0.561 | 0.561 | 0.561 | 0.561 | 0.561 | 0.561 | 0.561 | 0.561 | 0.561 | 0.561 | 0.561 | 0.561 | 0.561 | 0.561 | 0.561 |
| Armenia                                          | 0.541 | 0.541 | 0.541 | 0.544 | 0.546 | 0.546 | 0.546 | 0.546 | 0.546 | 0.546 | 0.546 | 0.546 | 0.546 | 0.546 | 0.546 | 0.546 | 0.546 | 0.546 | 0.546 | 0.546 | 0.546 | 0.546 | 0.546 | 0.546 | 0.546 | 0.546 | 0.546 | 0.546 | 0.546 | 0.546 |
| Azerbaijan                                       | 0.576 | 0.578 | 0.578 | 0.576 | 0.573 | 0.569 | 0.561 | 0.559 | 0.559 | 0.556 | 0.554 | 0.554 | 0.554 | 0.554 | 0.554 | 0.554 | 0.554 | 0.554 | 0.554 | 0.554 | 0.554 | 0.554 | 0.554 | 0.554 | 0.554 | 0.554 | 0.554 | 0.554 | 0.554 | 0.554 |
| Georgia                                          | 0.654 | 0.658 | 0.657 | 0.654 | 0.65  | 0.643 | 0.638 | 0.633 | 0.628 | 0.625 | 0.624 | 0.626 | 0.63  | 0.636 | 0.641 | 0.646 | 0.651 | 0.656 | 0.66  | 0.663 | 0.665 | 0.667 | 0.67  | 0.676 | 0.68  | 0.684 | 0.689 | 0.693 | 0.697 | 0.702 |
| Kazakhstan                                       | 0.602 | 0.606 | 0.611 | 0.615 | 0.619 | 0.622 | 0.625 | 0.628 | 0.631 | 0.632 | 0.633 | 0.633 | 0.633 | 0.633 | 0.633 | 0.633 | 0.633 | 0.633 | 0.633 | 0.633 | 0.633 | 0.633 | 0.633 | 0.633 | 0.633 | 0.633 | 0.633 | 0.633 | 0.633 | 0.633 |
| Kyrgyzstan                                       | 0.615 | 0.617 | 0.621 | 0.625 | 0.631 | 0.636 | 0.641 | 0.646 | 0.651 | 0.656 | 0.661 | 0.666 | 0.671 | 0.676 | 0.681 | 0.686 | 0.691 | 0.696 | 0.701 | 0.706 | 0.711 | 0.716 | 0.721 | 0.726 | 0.731 | 0.736 | 0.741 | 0.746 | 0.751 | 0.756 |
| Mongolia                                         | 0.605 | 0.607 | 0.611 | 0.615 | 0.619 | 0.623 | 0.627 | 0.631 | 0.635 | 0.639 | 0.643 | 0.647 | 0.651 | 0.655 | 0.659 | 0.663 | 0.667 | 0.671 | 0.675 | 0.679 | 0.683 | 0.687 | 0.691 | 0.695 | 0.699 | 0.703 | 0.707 | 0.711 | 0.715 | 0.719 |
| Tajikistan                                       | 0.408 | 0.413 | 0.414 | 0.414 | 0.414 | 0.414 | 0.414 | 0.414 | 0.414 | 0.414 | 0.414 | 0.414 | 0.414 | 0.414 | 0.414 | 0.414 | 0.414 | 0.414 | 0.414 | 0.414 | 0.414 | 0.414 | 0.414 | 0.414 | 0.414 | 0.414 | 0.414 | 0.414 | 0.414 | 0.414 |
| Turkmenistan                                     | 0.448 | 0.451 | 0.454 | 0.457 | 0.458 | 0.458 | 0.458 | 0.457 | 0.456 | 0.455 | 0.455 | 0.455 | 0.455 | 0.455 | 0.455 | 0.455 | 0.455 | 0.455 | 0.455 | 0.455 | 0.455 | 0.455 | 0.455 | 0.455 | 0.455 | 0.455 | 0.455 | 0.455 | 0.455 | 0.455 |
| Uzbekistan                                       | 0.49  | 0.492 | 0.494 | 0.496 | 0.498 | 0.501 | 0.505 | 0.51  | 0.515 | 0.52  | 0.525 | 0.531 | 0.536 | 0.541 | 0.546 | 0.551 | 0.556 | 0.561 | 0.566 | 0.571 | 0.576 | 0.581 | 0.586 | 0.591 | 0.596 | 0.601 | 0.606 | 0.611 | 0.616 | 0.621 |
| Central Europe                                   | 0.641 | 0.647 | 0.652 | 0.658 | 0.663 | 0.667 | 0.671 | 0.675 | 0.679 | 0.683 | 0.687 | 0.691 | 0.695 | 0.699 | 0.703 | 0.707 | 0.711 | 0.715 | 0.719 | 0.723 | 0.727 | 0.731 | 0.735 | 0.739 | 0.743 | 0.747 | 0.751 | 0.755 | 0.759 | 0.763 |
| Albania                                          | 0.54  | 0.537 | 0.534 | 0.532 | 0.531 | 0.53  | 0.529 | 0.528 | 0.527 | 0.526 | 0.525 | 0.524 | 0.523 | 0.522 | 0.521 | 0.52  | 0.519 | 0.518 | 0.517 | 0.516 | 0.515 | 0.514 | 0.513 | 0.512 | 0.511 | 0.51  | 0.509 | 0.508 | 0.507 | 0.506 |
| Bosnia and Herzegovina                           | 0.533 | 0.534 | 0.532 | 0.532 | 0.532 | 0.532 | 0.532 | 0.532 | 0.532 | 0.532 | 0.532 | 0.532 | 0.532 | 0.532 | 0.532 | 0.532 | 0.532 | 0.532 | 0.532 | 0.532 | 0.532 | 0.532 | 0.532 | 0.532 | 0.532 | 0.532 | 0.532 | 0.532 | 0.532 | 0.532 |
| Bulgaria                                         | 0.631 | 0.641 | 0.648 | 0.656 | 0.666 | 0.671 | 0.676 | 0.681 | 0.675 | 0.675 | 0.68  | 0.685 | 0.69  | 0.694 | 0.697 | 0.701 | 0.706 | 0.711 | 0.716 | 0.721 | 0.726 | 0.731 | 0.736 | 0.741 | 0.746 | 0.751 | 0.756 | 0.761 | 0.766 | 0.771 |
| Croatia                                          | 0.48  | 0.488 | 0.492 | 0.492 | 0.491 | 0.491 | 0.491 | 0.491 | 0.491 | 0.491 | 0.491 | 0.491 | 0.491 | 0.491 | 0.491 | 0.491 | 0.491 | 0.491 | 0.491 | 0.491 | 0.491 | 0.491 | 0.491 | 0.491 | 0.491 | 0.491 | 0.491 | 0.491 | 0.491 | 0.491 |
| Czech Republic                                   | 0.688 | 0.696 | 0.705 | 0.718 | 0.736 | 0.744 | 0.755 | 0.76  | 0.765 | 0.771 | 0.776 | 0.782 | 0.786 | 0.79  | 0.794 | 0.798 | 0.801 | 0.804 | 0.807 | 0.81  | 0.813 | 0.816 | 0.819 | 0.821 | 0.824 | 0.827 | 0.83  | 0.833 | 0.836 | 0.839 |
| Hungary                                          | 0.699 | 0.663 | 0.671 | 0.678 | 0.685 | 0.693 | 0.7   | 0.707 | 0.713 | 0.718 | 0.724 | 0.73  | 0.735 | 0.741 | 0.746 | 0.751 | 0.756 | 0.761 | 0.766 | 0.771 | 0.776 | 0.781 | 0.786 | 0.791 | 0.796 | 0.801 | 0.806 | 0.811 | 0.816 | 0.821 |
| Montenegro                                       | 0.701 | 0.701 | 0.699 | 0.695 | 0.69  | 0.687 | 0.686 | 0.687 | 0.689 | 0.692 | 0.696 | 0.701 | 0.706 | 0.712 | 0.717 | 0.723 | 0.729 | 0.736 | 0.743 | 0.749 | 0.756 | 0.763 | 0.77  | 0.776 | 0.781 | 0.786 | 0.791 | 0.796 | 0.801 | 0.806 |
| North Macedonia                                  | 0.62  | 0.62  | 0.623 | 0.625 | 0.627 | 0.631 | 0.635 | 0.64  | 0.646 | 0.651 | 0.656 | 0.662 | 0.668 | 0.674 | 0.679 | 0.684 | 0.689 | 0.694 | 0.699 | 0.704 | 0.709 | 0.714 | 0.719 | 0.724 | 0.729 | 0.734 | 0.739 | 0.744 | 0.749 | 0.754 |
| Poland                                           | 0.632 | 0.637 | 0.644 | 0.643 | 0.641 | 0.647 | 0.647 | 0.645 | 0.643 | 0.641 | 0.64  | 0.64  | 0.64  | 0.64  | 0.64  | 0.64  | 0.64  | 0.64  | 0.64  | 0.64  | 0.64  | 0.64  | 0.64  | 0.64  | 0.64  | 0.64  | 0.64  | 0.64  | 0.64  | 0.64  |
| Romania                                          | 0.625 | 0.632 | 0.635 | 0.638 | 0.643 | 0.649 | 0.655 | 0.663 | 0.669 | 0.674 | 0.68  | 0.687 | 0.692 | 0.698 | 0.703 | 0.708 | 0.713 | 0.718 | 0.723 | 0.728 | 0.733 | 0.738 | 0.743 | 0.748 | 0.753 | 0.758 | 0.763 | 0.768 | 0.773 | 0.778 |
| Serbia                                           | 0.626 | 0.635 | 0.639 | 0.639 | 0.64  | 0.644 | 0.647 | 0.651 | 0.655 | 0.66  | 0.665 | 0.67  | 0.676 | 0.681 | 0.686 | 0.691 | 0.696 | 0.701 | 0.706 | 0.711 | 0.716 | 0.721 | 0.726 | 0.731 | 0.736 | 0.741 | 0.746 | 0.751 | 0.756 | 0.761 |
| Slovakia                                         | 0.656 | 0.662 | 0.668 | 0.679 | 0.693 | 0.702 | 0.709 | 0.716 | 0.724 | 0.731 | 0.739 | 0.746 | 0.752 | 0.756 | 0.76  | 0.764 | 0.768 | 0.772 | 0.777 | 0.781 | 0.784 | 0.789 | 0.794 | 0.799 | 0.804 | 0.809 | 0.814 | 0.819 | 0.824 | 0.829 |
| Slovenia                                         | 0.726 | 0.731 | 0.736 | 0.741 | 0.746 | 0.751 | 0.756 | 0.762 | 0.768 | 0.774 | 0.78  | 0.787 | 0.793 | 0.799 | 0.805 | 0.811 | 0.817 | 0.823 | 0.829 | 0.835 | 0.841 | 0.847 | 0.853 | 0.859 | 0.865 | 0.871 | 0.877 | 0.883 | 0.889 | 0.895 |
| Eastern Europe                                   | 0.48  | 0.487 | 0.497 | 0.502 | 0.508 | 0.514 | 0.52  | 0.526 | 0.532 | 0.538 | 0.544 | 0.55  | 0.556 | 0.562 | 0.568 | 0.574 | 0.58  | 0.584 | 0.588 | 0.592 | 0.596 | 0.6   | 0.604 | 0.608 | 0.612 | 0.616 | 0.62  | 0.624 | 0.628 | 0.632 |
| Belarus                                          | 0.91  | 0.915 | 0.92  | 0.925 | 0.93  | 0.935 | 0.94  | 0.945 | 0.95  | 0.955 | 0.96  | 0.965 | 0.97  | 0.975 | 0.98  | 0.985 | 0.99  | 0.995 | 1.0   | 1.005 | 1.01  | 1.015 | 1.02  | 1.025 | 1.03  | 1.035 | 1.04  | 1.045 | 1.05  | 1.055 |
| Estonia                                          | 0.605 | 0.61  | 0.615 | 0.62  | 0.625 | 0.63  | 0.635 | 0.64  | 0.645 | 0.65  | 0.655 | 0.66  | 0.665 | 0.67  | 0.675 | 0.68  | 0.685 | 0.69  | 0.695 | 0.7   | 0.705 | 0.71  | 0.715 | 0.72  | 0.725 | 0.73  | 0.735 | 0.74  | 0.745 | 0.75  |
| Latvia                                           | 0.645 | 0.648 | 0.652 | 0.656 | 0.66  | 0.664 | 0.668 | 0.672 | 0.676 | 0.68  | 0.684 | 0.688 | 0.692 | 0.696 | 0.7   | 0.704 | 0.708 | 0.712 | 0.716 | 0.72  | 0.724 | 0.728 | 0.732 | 0.736 | 0.74  | 0.744 | 0.748 | 0.752 | 0.756 | 0.76  |
| Lithuania                                        | 0.67  | 0.672 | 0.672 | 0.672 | 0.672 | 0.672 | 0.672 | 0.672 | 0.672 | 0.672 | 0.672 | 0.672 | 0.672 | 0.672 | 0.672 | 0.672 | 0.672 | 0.672 | 0.672 | 0.672 | 0.672 | 0.672 | 0.672 | 0.672 | 0.672 | 0.672 | 0.672 | 0.672 | 0.672 | 0.672 |
| Maldives                                         | 0.585 | 0.589 | 0.591 | 0.594 | 0.594 | 0.594 | 0.594 | 0.594 | 0.594 | 0.594 | 0.594 | 0.594 | 0.594 | 0.594 | 0.594 | 0.594 | 0.594 | 0.594 | 0.594 | 0.594 | 0.594 | 0.594 | 0.594 | 0.594 | 0.594 | 0.594 | 0.594 | 0.594 | 0.594 | 0.594 |
| Ukraine                                          | 0.653 | 0.657 | 0.661 | 0.665 | 0.669 | 0.673 | 0.677 | 0.681 | 0.685 | 0.689 | 0.693 | 0.697 | 0.701 | 0.705 | 0.709 | 0.713 | 0.717 | 0.721 | 0.725 | 0.729 | 0.733 | 0.737 | 0.741 | 0.745 | 0.749 | 0.753 | 0.757 | 0.761 | 0.765 | 0.769 |
| High income                                      | 0.755 | 0.76  | 0.765 | 0.769 | 0.773 | 0.777 | 0.78  | 0.783 | 0.786 | 0.789 | 0.792 | 0.795 | 0.798 | 0.801 | 0.804 | 0.807 | 0.81  | 0.813 | 0.816 | 0.819 | 0.822 | 0.825 | 0.828 | 0.831 | 0.834 | 0.837 | 0.84  | 0.843 | 0.846 | 0.849 |
| Australia                                        | 0.742 | 0.746 | 0.749 | 0.753 | 0.757 | 0.761 | 0.765 | 0.769 | 0.773 | 0.777 | 0.781 | 0.785 | 0.789 | 0.793 | 0.797 | 0.801 | 0.805 | 0.809 | 0.813 | 0.817 | 0.821 | 0.825 | 0.829 | 0.833 | 0.837 | 0.841 | 0.845 | 0.849 |       |       |

Table S1 Socio-demographic index values for all estimated GBD 2019 locations, 1990-2011

| Location                | 1990  | 1991  | 1992  | 1993  | 1994  | 1995  | 1996  | 1997  | 1998  | 1999  | 2000  | 2001  | 2002  | 2003  | 2004  | 2005  | 2006  | 2007  | 2008  | 2009  | 2010  | 2011  | 2012  | 2013  | 2014  | 2015  | 2016  | 2017  | 2018  | 2019  |       |       |
|-------------------------|-------|-------|-------|-------|-------|-------|-------|-------|-------|-------|-------|-------|-------|-------|-------|-------|-------|-------|-------|-------|-------|-------|-------|-------|-------|-------|-------|-------|-------|-------|-------|-------|
| Waco                    | 0.79  | 0.79  | 0.79  | 0.80  | 0.80  | 0.80  | 0.81  | 0.81  | 0.81  | 0.81  | 0.81  | 0.82  | 0.82  | 0.82  | 0.83  | 0.83  | 0.83  | 0.83  | 0.83  | 0.83  | 0.83  | 0.83  | 0.83  | 0.83  | 0.83  | 0.83  | 0.83  | 0.83  | 0.83  | 0.83  |       |       |
| Winnipeg                | 0.78  | 0.78  | 0.78  | 0.79  | 0.79  | 0.79  | 0.79  | 0.79  | 0.79  | 0.79  | 0.79  | 0.79  | 0.79  | 0.79  | 0.79  | 0.79  | 0.79  | 0.79  | 0.79  | 0.79  | 0.79  | 0.79  | 0.79  | 0.79  | 0.79  | 0.79  | 0.79  | 0.79  | 0.79  | 0.79  |       |       |
| Western Latin America   | 0.584 | 0.589 | 0.597 | 0.602 | 0.608 | 0.614 | 0.62  | 0.625 | 0.63  | 0.634 | 0.64  | 0.644 | 0.648 | 0.651 | 0.653 | 0.655 | 0.663 | 0.664 | 0.667 | 0.671 | 0.676 | 0.681 | 0.686 | 0.689 | 0.692 | 0.696 | 0.701 | 0.71  | 0.716 | 0.719 | 0.721 |       |
| Argentina               | 0.581 | 0.585 | 0.593 | 0.599 | 0.605 | 0.611 | 0.617 | 0.622 | 0.625 | 0.628 | 0.634 | 0.641 | 0.644 | 0.646 | 0.648 | 0.651 | 0.655 | 0.657 | 0.661 | 0.665 | 0.669 | 0.674 | 0.678 | 0.682 | 0.687 | 0.692 | 0.696 | 0.702 | 0.706 | 0.708 | 0.709 |       |
| Chile                   | 0.592 | 0.6   | 0.606 | 0.611 | 0.617 | 0.622 | 0.628 | 0.633 | 0.638 | 0.643 | 0.648 | 0.653 | 0.658 | 0.663 | 0.668 | 0.673 | 0.678 | 0.683 | 0.688 | 0.693 | 0.698 | 0.703 | 0.708 | 0.713 | 0.718 | 0.723 | 0.728 | 0.733 | 0.738 | 0.743 | 0.748 |       |
| Uruguay                 | 0.581 | 0.584 | 0.588 | 0.591 | 0.594 | 0.597 | 0.6   | 0.606 | 0.612 | 0.618 | 0.622 | 0.626 | 0.628 | 0.631 | 0.633 | 0.636 | 0.639 | 0.642 | 0.645 | 0.649 | 0.653 | 0.658 | 0.663 | 0.668 | 0.673 | 0.678 | 0.683 | 0.688 | 0.693 | 0.697 | 0.701 |       |
| Western Europe          | 0.75  | 0.76  | 0.762 | 0.767 | 0.771 | 0.775 | 0.779 | 0.782 | 0.784 | 0.787 | 0.79  | 0.794 | 0.797 | 0.8   | 0.802 | 0.805 | 0.807 | 0.81  | 0.812 | 0.815 | 0.817 | 0.821 | 0.824 | 0.827 | 0.83  | 0.832 | 0.835 | 0.838 | 0.841 | 0.843 | 0.845 |       |
| Austria                 | 0.844 | 0.848 | 0.84  | 0.841 | 0.841 | 0.841 | 0.841 | 0.841 | 0.841 | 0.841 | 0.841 | 0.841 | 0.841 | 0.841 | 0.841 | 0.841 | 0.841 | 0.841 | 0.841 | 0.841 | 0.841 | 0.841 | 0.841 | 0.841 | 0.841 | 0.841 | 0.841 | 0.841 | 0.841 | 0.841 | 0.841 |       |
| Belgium                 | 0.746 | 0.75  | 0.756 | 0.762 | 0.767 | 0.771 | 0.775 | 0.779 | 0.782 | 0.784 | 0.787 | 0.792 | 0.796 | 0.799 | 0.802 | 0.805 | 0.808 | 0.81  | 0.813 | 0.816 | 0.82  | 0.824 | 0.829 | 0.834 | 0.837 | 0.841 | 0.843 | 0.846 | 0.849 | 0.851 | 0.853 |       |
| Cyprus                  | 0.642 | 0.67  | 0.68  | 0.691 | 0.702 | 0.713 | 0.723 | 0.732 | 0.741 | 0.75  | 0.758 | 0.767 | 0.774 | 0.78  | 0.786 | 0.791 | 0.797 | 0.804 | 0.81  | 0.816 | 0.822 | 0.827 | 0.832 | 0.837 | 0.842 | 0.847 | 0.852 | 0.857 | 0.862 | 0.867 | 0.872 | 0.877 |
| Denmark                 | 0.806 | 0.809 | 0.813 | 0.816 | 0.82  | 0.824 | 0.828 | 0.833 | 0.836 | 0.84  | 0.844 | 0.848 | 0.852 | 0.855 | 0.858 | 0.86  | 0.862 | 0.864 | 0.865 | 0.867 | 0.87  | 0.873 | 0.875 | 0.878 | 0.88  | 0.882 | 0.884 | 0.886 | 0.888 | 0.889 | 0.89  |       |
| Estonia                 | 0.737 | 0.739 | 0.742 | 0.745 | 0.749 | 0.753 | 0.757 | 0.761 | 0.764 | 0.768 | 0.772 | 0.776 | 0.78  | 0.783 | 0.786 | 0.789 | 0.792 | 0.795 | 0.798 | 0.801 | 0.804 | 0.807 | 0.81  | 0.813 | 0.815 | 0.817 | 0.819 | 0.821 | 0.823 | 0.825 | 0.827 |       |
| France                  | 0.738 | 0.743 | 0.75  | 0.755 | 0.761 | 0.767 | 0.773 | 0.779 | 0.785 | 0.791 | 0.797 | 0.803 | 0.809 | 0.815 | 0.821 | 0.827 | 0.833 | 0.839 | 0.845 | 0.851 | 0.857 | 0.863 | 0.869 | 0.875 | 0.881 | 0.887 | 0.893 | 0.899 | 0.905 | 0.911 | 0.917 |       |
| Germany                 | 0.819 | 0.83  | 0.838 | 0.844 | 0.849 | 0.854 | 0.859 | 0.864 | 0.869 | 0.874 | 0.879 | 0.884 | 0.889 | 0.894 | 0.899 | 0.904 | 0.909 | 0.914 | 0.919 | 0.924 | 0.929 | 0.934 | 0.939 | 0.944 | 0.949 | 0.954 | 0.959 | 0.964 | 0.969 | 0.974 | 0.979 |       |
| Greece                  | 0.682 | 0.688 | 0.695 | 0.702 | 0.707 | 0.713 | 0.719 | 0.725 | 0.731 | 0.737 | 0.743 | 0.749 | 0.755 | 0.761 | 0.767 | 0.773 | 0.779 | 0.785 | 0.791 | 0.797 | 0.803 | 0.809 | 0.815 | 0.821 | 0.827 | 0.833 | 0.839 | 0.845 | 0.851 | 0.857 | 0.863 |       |
| Iceland                 | 0.764 | 0.77  | 0.774 | 0.778 | 0.782 | 0.785 | 0.788 | 0.79  | 0.794 | 0.799 | 0.806 | 0.813 | 0.818 | 0.822 | 0.824 | 0.827 | 0.83  | 0.834 | 0.838 | 0.842 | 0.846 | 0.847 | 0.847 | 0.848 | 0.85  | 0.854 | 0.858 | 0.863 | 0.868 | 0.873 | 0.878 |       |
| Ireland                 | 0.73  | 0.735 | 0.741 | 0.747 | 0.753 | 0.758 | 0.763 | 0.768 | 0.774 | 0.78  | 0.786 | 0.793 | 0.799 | 0.806 | 0.812 | 0.816 | 0.819 | 0.821 | 0.824 | 0.827 | 0.831 | 0.835 | 0.839 | 0.843 | 0.847 | 0.851 | 0.855 | 0.859 | 0.864 | 0.868 | 0.873 |       |
| Israel                  | 0.717 | 0.721 | 0.726 | 0.73  | 0.734 | 0.738 | 0.742 | 0.745 | 0.749 | 0.752 | 0.756 | 0.76  | 0.762 | 0.765 | 0.769 | 0.773 | 0.776 | 0.779 | 0.783 | 0.787 | 0.791 | 0.794 | 0.797 | 0.8   | 0.803 | 0.806 | 0.809 | 0.812 | 0.815 | 0.818 | 0.821 |       |
| Italy                   | 0.712 | 0.717 | 0.722 | 0.727 | 0.732 | 0.737 | 0.742 | 0.747 | 0.752 | 0.757 | 0.762 | 0.767 | 0.772 | 0.777 | 0.782 | 0.787 | 0.792 | 0.797 | 0.802 | 0.807 | 0.812 | 0.817 | 0.822 | 0.827 | 0.832 | 0.837 | 0.842 | 0.847 | 0.852 | 0.857 | 0.862 |       |
| Luxembourg              | 0.818 | 0.82  | 0.824 | 0.828 | 0.832 | 0.836 | 0.84  | 0.844 | 0.848 | 0.852 | 0.856 | 0.86  | 0.864 | 0.868 | 0.872 | 0.876 | 0.88  | 0.884 | 0.888 | 0.892 | 0.896 | 0.9   | 0.904 | 0.908 | 0.912 | 0.916 | 0.92  | 0.924 | 0.928 | 0.932 | 0.936 |       |
| Malta                   | 0.666 | 0.67  | 0.675 | 0.682 | 0.689 | 0.695 | 0.701 | 0.707 | 0.713 | 0.719 | 0.725 | 0.731 | 0.737 | 0.743 | 0.749 | 0.755 | 0.761 | 0.767 | 0.773 | 0.779 | 0.785 | 0.791 | 0.797 | 0.803 | 0.809 | 0.815 | 0.821 | 0.827 | 0.833 | 0.839 |       |       |
| Maldives                | 0.834 | 0.837 | 0.84  | 0.843 | 0.846 | 0.849 | 0.852 | 0.855 | 0.858 | 0.861 | 0.864 | 0.867 | 0.87  | 0.872 | 0.875 | 0.877 | 0.879 | 0.881 | 0.883 | 0.886 | 0.888 | 0.89  | 0.892 | 0.893 | 0.895 | 0.897 | 0.899 | 0.901 | 0.903 | 0.905 | 0.907 |       |
| Netherlands             | 0.796 | 0.801 | 0.806 | 0.811 | 0.816 | 0.821 | 0.826 | 0.831 | 0.836 | 0.841 | 0.846 | 0.851 | 0.856 | 0.861 | 0.866 | 0.871 | 0.876 | 0.881 | 0.886 | 0.891 | 0.896 | 0.901 | 0.906 | 0.911 | 0.916 | 0.921 | 0.926 | 0.931 | 0.936 | 0.941 | 0.946 |       |
| Norway                  | 0.807 | 0.812 | 0.818 | 0.823 | 0.828 | 0.833 | 0.838 | 0.843 | 0.848 | 0.853 | 0.858 | 0.863 | 0.868 | 0.873 | 0.878 | 0.883 | 0.888 | 0.893 | 0.898 | 0.903 | 0.908 | 0.913 | 0.918 | 0.923 | 0.928 | 0.933 | 0.938 | 0.943 | 0.948 | 0.953 | 0.958 |       |
| Portugal                | 0.607 | 0.615 | 0.622 | 0.629 | 0.636 | 0.643 | 0.65  | 0.657 | 0.664 | 0.671 | 0.678 | 0.685 | 0.692 | 0.699 | 0.706 | 0.713 | 0.72  | 0.727 | 0.734 | 0.741 | 0.748 | 0.755 | 0.762 | 0.769 | 0.776 | 0.783 | 0.79  | 0.797 | 0.804 | 0.811 |       |       |
| Sao Paulo               | 0.617 | 0.621 | 0.625 | 0.629 | 0.633 | 0.637 | 0.641 | 0.645 | 0.649 | 0.653 | 0.657 | 0.661 | 0.665 | 0.669 | 0.673 | 0.677 | 0.681 | 0.685 | 0.689 | 0.693 | 0.697 | 0.701 | 0.705 | 0.709 | 0.713 | 0.717 | 0.721 | 0.725 | 0.729 | 0.733 | 0.737 |       |
| Spain                   | 0.647 | 0.655 | 0.662 | 0.669 | 0.675 | 0.681 | 0.687 | 0.693 | 0.699 | 0.705 | 0.711 | 0.717 | 0.723 | 0.729 | 0.735 | 0.741 | 0.747 | 0.753 | 0.759 | 0.765 | 0.771 | 0.777 | 0.783 | 0.789 | 0.795 | 0.801 | 0.807 | 0.813 | 0.819 | 0.825 | 0.831 |       |
| Sweden                  | 0.769 | 0.775 | 0.782 | 0.788 | 0.794 | 0.801 | 0.806 | 0.811 | 0.815 | 0.819 | 0.823 | 0.828 | 0.833 | 0.838 | 0.843 | 0.848 | 0.853 | 0.858 | 0.863 | 0.868 | 0.873 | 0.878 | 0.883 | 0.888 | 0.893 | 0.898 | 0.903 | 0.908 | 0.913 | 0.918 | 0.923 |       |
| Stockholm               | 0.813 | 0.818 | 0.824 | 0.829 | 0.834 | 0.839 | 0.844 | 0.848 | 0.853 | 0.858 | 0.863 | 0.868 | 0.873 | 0.878 | 0.883 | 0.888 | 0.893 | 0.898 | 0.903 | 0.908 | 0.913 | 0.918 | 0.923 | 0.928 | 0.933 | 0.938 | 0.943 | 0.948 | 0.953 | 0.958 | 0.963 |       |
| Sweden except Stockholm | 0.738 | 0.744 | 0.751 | 0.757 | 0.764 | 0.771 | 0.778 | 0.785 | 0.792 | 0.799 | 0.806 | 0.813 | 0.82  | 0.827 | 0.834 | 0.841 | 0.848 | 0.855 | 0.862 | 0.869 | 0.876 | 0.883 | 0.89  | 0.897 | 0.904 | 0.911 | 0.918 | 0.925 | 0.932 | 0.939 | 0.946 |       |
| Switzerland             | 0.808 | 0.809 | 0.813 | 0.817 | 0.821 | 0.825 | 0.829 | 0.833 | 0.837 | 0.841 | 0.845 | 0.849 | 0.853 | 0.857 | 0.861 | 0.865 | 0.869 | 0.873 | 0.877 | 0.881 | 0.885 | 0.889 | 0.893 | 0.897 | 0.901 | 0.905 | 0.909 | 0.913 | 0.917 | 0.921 | 0.925 |       |
| UK                      | 0.75  | 0.755 | 0.76  | 0.765 | 0.77  | 0.774 | 0.778 | 0.782 | 0.786 | 0.79  | 0.794 | 0.798 | 0.802 | 0.806 | 0.81  | 0.814 | 0.818 | 0.822 | 0.826 | 0.83  | 0.834 | 0.838 | 0.842 | 0.846 | 0.85  | 0.854 | 0.858 | 0.862 | 0.866 | 0.87  | 0.874 |       |
| England                 | 0.75  | 0.755 | 0.76  | 0.765 | 0.77  | 0.774 | 0.778 | 0.782 | 0.786 | 0.79  | 0.794 | 0.798 | 0.802 | 0.806 | 0.81  | 0.814 | 0.818 | 0.822 | 0.826 | 0.83  | 0.834 | 0.838 | 0.842 | 0.846 | 0.85  | 0.854 | 0.858 | 0.862 | 0.866 | 0.87  | 0.874 |       |
| East Midlands           | 0.725 | 0.73  | 0.735 | 0.74  | 0.745 | 0.749 | 0.754 | 0.758 | 0.763 | 0.767 | 0.771 | 0.775 | 0.779 | 0.783 | 0.787 | 0.791 | 0.795 | 0.799 | 0.803 | 0.807 | 0.811 | 0.815 | 0.819 | 0.823 | 0.827 | 0.831 | 0.835 | 0.839 | 0.843 | 0.847 | 0.851 |       |
| Derby                   | 0.738 | 0.741 | 0.7   |       |       |       |       |       |       |       |       |       |       |       |       |       |       |       |       |       |       |       |       |       |       |       |       |       |       |       |       |       |

Table S1: Socio-demographic index values for all estimated CBD 2019 locations, 1990-2011

| Location                   | 1990  | 1991  | 1992  | 1993  | 1994  | 1995  | 1996  | 1997  | 1998  | 1999  | 2000  | 2001  | 2002  | 2003  | 2004  | 2005  | 2006  | 2007  | 2008  | 2009  | 2010  | 2011  | 2012  | 2013  | 2014  | 2015  | 2016  | 2017    | 2018  | 2019  |       |
|----------------------------|-------|-------|-------|-------|-------|-------|-------|-------|-------|-------|-------|-------|-------|-------|-------|-------|-------|-------|-------|-------|-------|-------|-------|-------|-------|-------|-------|---------|-------|-------|-------|
| West Sussex                | 0.795 | 0.769 | 0.774 | 0.779 | 0.783 | 0.786 | 0.788 | 0.79  | 0.794 | 0.798 | 0.803 | 0.807 | 0.811 | 0.814 | 0.818 | 0.821 | 0.824 | 0.827 | 0.83  | 0.833 | 0.835 | 0.837 | 0.839 | 0.841 | 0.843 | 0.845 | 0.847 | 0.849   | 0.851 | 0.853 |       |
| Wales and West Midlands    | 0.719 | 0.711 | 0.715 | 0.719 | 0.723 | 0.727 | 0.731 | 0.735 | 0.739 | 0.743 | 0.747 | 0.751 | 0.755 | 0.759 | 0.763 | 0.767 | 0.771 | 0.775 | 0.779 | 0.783 | 0.787 | 0.791 | 0.795 | 0.799 | 0.803 | 0.807 | 0.811 | 0.815   | 0.819 | 0.823 |       |
| Widening                   | 0.626 | 0.631 | 0.635 | 0.639 | 0.643 | 0.647 | 0.651 | 0.655 | 0.659 | 0.663 | 0.667 | 0.671 | 0.675 | 0.679 | 0.683 | 0.687 | 0.691 | 0.695 | 0.699 | 0.703 | 0.707 | 0.711 | 0.715 | 0.719 | 0.723 | 0.727 | 0.731 | 0.735   | 0.739 | 0.743 |       |
| South West Midlands        | 0.751 | 0.755 | 0.76  | 0.765 | 0.77  | 0.775 | 0.779 | 0.783 | 0.787 | 0.791 | 0.795 | 0.799 | 0.803 | 0.807 | 0.811 | 0.815 | 0.819 | 0.823 | 0.827 | 0.831 | 0.835 | 0.839 | 0.843 | 0.847 | 0.851 | 0.855 | 0.859 | 0.863   | 0.867 | 0.871 |       |
| Both North and East London | 0.793 | 0.797 | 0.801 | 0.805 | 0.809 | 0.813 | 0.817 | 0.821 | 0.825 | 0.829 | 0.833 | 0.837 | 0.841 | 0.845 | 0.849 | 0.853 | 0.857 | 0.861 | 0.865 | 0.869 | 0.873 | 0.877 | 0.881 | 0.885 | 0.889 | 0.893 | 0.897 | 0.901   | 0.905 | 0.909 |       |
| Bournemouth                | 0.761 | 0.766 | 0.771 | 0.776 | 0.781 | 0.785 | 0.789 | 0.793 | 0.797 | 0.801 | 0.805 | 0.809 | 0.813 | 0.817 | 0.821 | 0.825 | 0.829 | 0.833 | 0.837 | 0.841 | 0.845 | 0.849 | 0.853 | 0.857 | 0.861 | 0.865 | 0.869 | 0.873   | 0.877 | 0.881 |       |
| Bristol, City of           | 0.792 | 0.796 | 0.801 | 0.805 | 0.81  | 0.814 | 0.817 | 0.821 | 0.825 | 0.829 | 0.833 | 0.837 | 0.841 | 0.845 | 0.849 | 0.853 | 0.857 | 0.861 | 0.865 | 0.869 | 0.873 | 0.877 | 0.881 | 0.885 | 0.889 | 0.893 | 0.897 | 0.901   | 0.905 | 0.909 |       |
| Cambridge                  | 0.757 | 0.761 | 0.765 | 0.769 | 0.773 | 0.777 | 0.781 | 0.785 | 0.789 | 0.793 | 0.797 | 0.801 | 0.805 | 0.809 | 0.813 | 0.817 | 0.821 | 0.825 | 0.829 | 0.833 | 0.837 | 0.841 | 0.845 | 0.849 | 0.853 | 0.857 | 0.861 | 0.865   | 0.869 | 0.873 | 0.877 |
| Derby                      | 0.747 | 0.752 | 0.757 | 0.762 | 0.767 | 0.772 | 0.777 | 0.782 | 0.787 | 0.792 | 0.797 | 0.802 | 0.807 | 0.812 | 0.817 | 0.822 | 0.827 | 0.832 | 0.837 | 0.842 | 0.847 | 0.852 | 0.857 | 0.862 | 0.867 | 0.872 | 0.877 | 0.882   | 0.887 | 0.892 | 0.897 |
| Donset                     | 0.741 | 0.746 | 0.751 | 0.756 | 0.761 | 0.766 | 0.771 | 0.776 | 0.781 | 0.786 | 0.791 | 0.796 | 0.801 | 0.806 | 0.811 | 0.816 | 0.821 | 0.826 | 0.831 | 0.836 | 0.841 | 0.846 | 0.851 | 0.856 | 0.861 | 0.866 | 0.871 | 0.876   | 0.881 | 0.886 | 0.891 |
| Gloucestershire            | 0.764 | 0.768 | 0.773 | 0.778 | 0.783 | 0.788 | 0.793 | 0.798 | 0.803 | 0.808 | 0.813 | 0.818 | 0.823 | 0.828 | 0.833 | 0.838 | 0.843 | 0.848 | 0.853 | 0.858 | 0.863 | 0.868 | 0.873 | 0.878 | 0.883 | 0.888 | 0.893 | 0.898   | 0.903 | 0.908 | 0.913 |
| North Somerset             | 0.744 | 0.749 | 0.754 | 0.759 | 0.764 | 0.769 | 0.774 | 0.779 | 0.784 | 0.789 | 0.794 | 0.799 | 0.804 | 0.809 | 0.814 | 0.819 | 0.824 | 0.829 | 0.834 | 0.839 | 0.844 | 0.849 | 0.854 | 0.859 | 0.864 | 0.869 | 0.874 | 0.879   | 0.884 | 0.889 | 0.894 |
| Plymouth                   | 0.746 | 0.751 | 0.756 | 0.761 | 0.766 | 0.771 | 0.776 | 0.781 | 0.786 | 0.791 | 0.796 | 0.801 | 0.806 | 0.811 | 0.816 | 0.821 | 0.826 | 0.831 | 0.836 | 0.841 | 0.846 | 0.851 | 0.856 | 0.861 | 0.866 | 0.871 | 0.876 | 0.881   | 0.886 | 0.891 | 0.896 |
| Poole                      | 0.753 | 0.758 | 0.763 | 0.768 | 0.773 | 0.778 | 0.783 | 0.788 | 0.793 | 0.798 | 0.803 | 0.808 | 0.813 | 0.818 | 0.823 | 0.828 | 0.833 | 0.838 | 0.843 | 0.848 | 0.853 | 0.858 | 0.863 | 0.868 | 0.873 | 0.878 | 0.883 | 0.888   | 0.893 | 0.898 | 0.903 |
| South West                 | 0.732 | 0.737 | 0.742 | 0.747 | 0.752 | 0.757 | 0.762 | 0.767 | 0.772 | 0.777 | 0.782 | 0.787 | 0.792 | 0.797 | 0.802 | 0.807 | 0.812 | 0.817 | 0.822 | 0.827 | 0.832 | 0.837 | 0.842 | 0.847 | 0.852 | 0.857 | 0.862 | 0.867   | 0.872 | 0.877 | 0.882 |
| South Gloucestershire      | 0.776 | 0.78  | 0.784 | 0.788 | 0.792 | 0.796 | 0.799 | 0.803 | 0.807 | 0.811 | 0.815 | 0.819 | 0.823 | 0.827 | 0.831 | 0.835 | 0.839 | 0.843 | 0.847 | 0.851 | 0.855 | 0.859 | 0.863 | 0.867 | 0.871 | 0.875 | 0.879 | 0.883   | 0.887 | 0.891 | 0.895 |
| Sussex                     | 0.765 | 0.77  | 0.775 | 0.78  | 0.785 | 0.79  | 0.794 | 0.799 | 0.804 | 0.809 | 0.814 | 0.819 | 0.824 | 0.829 | 0.834 | 0.839 | 0.844 | 0.849 | 0.854 | 0.859 | 0.864 | 0.869 | 0.874 | 0.879 | 0.884 | 0.889 | 0.894 | 0.899   | 0.904 | 0.909 | 0.914 |
| Torkey                     | 0.71  | 0.715 | 0.72  | 0.725 | 0.73  | 0.735 | 0.74  | 0.745 | 0.75  | 0.755 | 0.76  | 0.765 | 0.77  | 0.775 | 0.78  | 0.785 | 0.79  | 0.795 | 0.8   | 0.805 | 0.81  | 0.815 | 0.82  | 0.825 | 0.83  | 0.835 | 0.84  | 0.845   | 0.85  | 0.855 |       |
| Wiltshire                  | 0.751 | 0.755 | 0.759 | 0.764 | 0.769 | 0.774 | 0.779 | 0.784 | 0.789 | 0.794 | 0.799 | 0.804 | 0.809 | 0.814 | 0.819 | 0.824 | 0.829 | 0.834 | 0.839 | 0.844 | 0.849 | 0.854 | 0.859 | 0.864 | 0.869 | 0.874 | 0.879 | 0.884   | 0.889 | 0.894 | 0.899 |
| West Midlands              | 0.736 | 0.741 | 0.746 | 0.751 | 0.756 | 0.761 | 0.766 | 0.771 | 0.776 | 0.781 | 0.786 | 0.791 | 0.796 | 0.801 | 0.806 | 0.811 | 0.816 | 0.821 | 0.826 | 0.831 | 0.836 | 0.841 | 0.846 | 0.851 | 0.856 | 0.861 | 0.866 | 0.871   | 0.876 | 0.881 | 0.886 |
| Wokingham                  | 0.756 | 0.762 | 0.767 | 0.772 | 0.777 | 0.782 | 0.787 | 0.792 | 0.797 | 0.802 | 0.807 | 0.812 | 0.817 | 0.822 | 0.827 | 0.832 | 0.837 | 0.842 | 0.847 | 0.852 | 0.857 | 0.862 | 0.867 | 0.872 | 0.877 | 0.882 | 0.887 | 0.892   | 0.897 | 0.902 | 0.907 |
| Conyouth                   | 0.738 | 0.744 | 0.75  | 0.756 | 0.761 | 0.766 | 0.771 | 0.776 | 0.781 | 0.786 | 0.791 | 0.796 | 0.801 | 0.806 | 0.811 | 0.816 | 0.821 | 0.826 | 0.831 | 0.836 | 0.841 | 0.846 | 0.851 | 0.856 | 0.861 | 0.866 | 0.871 | 0.876   | 0.881 | 0.886 | 0.891 |
| Darley                     | 0.699 | 0.704 | 0.709 | 0.714 | 0.719 | 0.724 | 0.729 | 0.734 | 0.739 | 0.744 | 0.749 | 0.754 | 0.759 | 0.764 | 0.769 | 0.774 | 0.779 | 0.784 | 0.789 | 0.794 | 0.799 | 0.804 | 0.809 | 0.814 | 0.819 | 0.824 | 0.829 | 0.834   | 0.839 | 0.844 | 0.849 |
| Herefordshire, County of   | 0.722 | 0.727 | 0.732 | 0.737 | 0.742 | 0.747 | 0.752 | 0.757 | 0.762 | 0.767 | 0.772 | 0.777 | 0.782 | 0.787 | 0.792 | 0.797 | 0.802 | 0.807 | 0.812 | 0.817 | 0.822 | 0.827 | 0.832 | 0.837 | 0.842 | 0.847 | 0.852 | 0.857   | 0.862 | 0.867 | 0.872 |
| Huddersfield               | 0.677 | 0.682 | 0.687 | 0.692 | 0.697 | 0.702 | 0.707 | 0.712 | 0.717 | 0.722 | 0.727 | 0.732 | 0.737 | 0.742 | 0.747 | 0.752 | 0.757 | 0.762 | 0.767 | 0.772 | 0.777 | 0.782 | 0.787 | 0.792 | 0.797 | 0.802 | 0.807 | 0.812   | 0.817 | 0.822 | 0.827 |
| Shephard                   | 0.728 | 0.733 | 0.738 | 0.743 | 0.748 | 0.753 | 0.758 | 0.763 | 0.768 | 0.773 | 0.778 | 0.783 | 0.788 | 0.793 | 0.798 | 0.803 | 0.808 | 0.813 | 0.818 | 0.823 | 0.828 | 0.833 | 0.838 | 0.843 | 0.848 | 0.853 | 0.858 | 0.863   | 0.868 | 0.873 | 0.878 |
| Southampton                | 0.695 | 0.7   | 0.705 | 0.71  | 0.715 | 0.72  | 0.725 | 0.73  | 0.735 | 0.74  | 0.745 | 0.75  | 0.755 | 0.76  | 0.765 | 0.77  | 0.775 | 0.78  | 0.785 | 0.79  | 0.795 | 0.8   | 0.805 | 0.81  | 0.815 | 0.82  | 0.825 | 0.83    | 0.835 | 0.84  | 0.845 |
| Staffordshire              | 0.725 | 0.73  | 0.736 | 0.742 | 0.747 | 0.752 | 0.757 | 0.762 | 0.767 | 0.772 | 0.777 | 0.782 | 0.787 | 0.792 | 0.797 | 0.802 | 0.807 | 0.812 | 0.817 | 0.822 | 0.827 | 0.832 | 0.837 | 0.842 | 0.847 | 0.852 | 0.857 | 0.862   | 0.867 | 0.872 | 0.877 |
| Stoke-on-Trent             | 0.687 | 0.692 | 0.697 | 0.702 | 0.707 | 0.712 | 0.717 | 0.722 | 0.727 | 0.732 | 0.737 | 0.742 | 0.747 | 0.752 | 0.757 | 0.762 | 0.767 | 0.772 | 0.777 | 0.782 | 0.787 | 0.792 | 0.797 | 0.802 | 0.807 | 0.812 | 0.817 | 0.822   | 0.827 | 0.832 | 0.837 |
| Telford and Wrekin         | 0.718 | 0.723 | 0.728 | 0.733 | 0.738 | 0.743 | 0.748 | 0.753 | 0.758 | 0.763 | 0.768 | 0.773 | 0.778 | 0.783 | 0.788 | 0.793 | 0.798 | 0.803 | 0.808 | 0.813 | 0.818 | 0.823 | 0.828 | 0.833 | 0.838 | 0.843 | 0.848 | 0.853   | 0.858 | 0.863 | 0.868 |
| Walsall                    | 0.681 | 0.685 | 0.689 | 0.693 | 0.697 | 0.701 | 0.705 | 0.709 | 0.713 | 0.717 | 0.721 | 0.725 | 0.729 | 0.733 | 0.737 | 0.741 | 0.745 | 0.749 | 0.753 | 0.757 | 0.761 | 0.765 | 0.769 | 0.773 | 0.777 | 0.781 | 0.785 | 0.789   | 0.793 | 0.797 | 0.801 |
| Warwickshire               | 0.754 | 0.758 | 0.762 | 0.766 | 0.77  | 0.774 | 0.778 | 0.782 | 0.786 | 0.79  | 0.794 | 0.798 | 0.802 | 0.806 | 0.81  | 0.814 | 0.818 | 0.822 | 0.826 | 0.83  | 0.834 | 0.838 | 0.842 | 0.846 | 0.85  | 0.854 | 0.858 | 0.862   | 0.866 | 0.87  | 0.874 |
| Wiltshire                  | 0.751 | 0.755 | 0.759 | 0.764 | 0.769 | 0.774 | 0.779 | 0.784 | 0.789 | 0.794 | 0.799 | 0.804 | 0.809 | 0.814 | 0.819 | 0.824 | 0.829 | 0.834 | 0.839 | 0.844 | 0.849 | 0.854 | 0.859 | 0.864 | 0.869 | 0.874 | 0.879 | 0.884   | 0.889 | 0.894 | 0.899 |
| Wokingham                  | 0.756 | 0.761 | 0.766 | 0.771 | 0.776 | 0.781 | 0.786 | 0.791 | 0.796 | 0.801 | 0.806 | 0.811 | 0.816 | 0.821 | 0.826 | 0.831 | 0.836 | 0.841 | 0.846 | 0.851 | 0.856 | 0.861 | 0.866 | 0.871 | 0.876 | 0.881 | 0.886 | 0.891</ |       |       |       |





**Table S2** Five socio-demographic index quintiles in GBD 2019

| <b>Sdi_quintile</b> | <b>Lower_bound</b> | <b>Upper_bound</b> |
|---------------------|--------------------|--------------------|
| Low SDI             | 0                  | 0.454743           |
| Low-middle SDI      | 0.454743           | 0.607679           |
| Middle SDI          | 0.607679           | 0.689504           |
| High-middle SDI     | 0.689504           | 0.805129           |
| High SDI            | 0.805129           | 1                  |

**Table S3** Regional incident cases and age-standardized incidence rate of genitourinary cancers in 2019

| Region                              | Kidney cancer                    |                             | Bladder cancer                   |                             | Prostate cancer                  |                             |
|-------------------------------------|----------------------------------|-----------------------------|----------------------------------|-----------------------------|----------------------------------|-----------------------------|
|                                     | Incident cases ( $\times 10^3$ ) | ASIR per 100,000 population | Incident cases ( $\times 10^3$ ) | ASIR per 100,000 population | Incident cases ( $\times 10^3$ ) | ASIR per 100,000 population |
| <b>Andean Latin America</b>         | 2.02(1.60 - 2.50)                | 3.51(2.78 - 4.35)           | 1.38(1.13 - 1.68)                | 2.52(2.05 - 3.05)           | 12.09(9.19 - 15.59)              | 47.52(36.13 - 61.32)        |
| <b>Australasia</b>                  | 4.09(3.29 - 5.10)                | 8.98(7.19 - 11.22)          | 4.41(3.56 - 5.52)                | 8.66(6.98 - 10.85)          | 25.70(19.14 - 37.96)             | 108.35(80.76 - 159.34)      |
| <b>Caribbean</b>                    | 1.86(1.54 - 2.21)                | 3.68(3.05 - 4.37)           | 2.82(2.42 - 3.3)                 | 5.45(4.68 - 6.39)           | 22.76(17.70 - 28.12)             | 95.83(74.43 - 118.13)       |
| <b>Central Asia</b>                 | 3.91(3.52 - 4.34)                | 4.75(4.31 - 5.24)           | 3.26(2.93 - 3.60)                | 4.57(4.09 - 5.04)           | 4.77(3.84 - 5.73)                | 18.62(14.69 - 22.13)        |
| <b>Central Europe</b>               | 17.69(15.49 - 20.14)             | 8.90(7.79 - 10.12)          | 27.06(23.61 - 30.69)             | 12.61(10.98 - 14.29)        | 43.82(32.06 - 51.72)             | 46.76(34.28 - 55.2)         |
| <b>Central Latin America</b>        | 10.41(8.89 - 12.10)              | 4.32(3.69 - 5.02)           | 6.23(5.33 - 7.28)                | 2.68(2.30 - 3.14)           | 65.12(51.32 - 86.14)             | 62.29(49.43 - 82.24)        |
| <b>Central Sub-Saharan Africa</b>   | 0.77(0.58 - 1.00)                | 1.13(0.84 - 1.55)           | 1.75(1.11 - 2.58)                | 3.78(2.35 - 5.56)           | 4.53(3.18 - 5.80)                | 29.16(20.09 - 37.48)        |
| <b>East Asia</b>                    | 64.26(54.11 - 75.60)             | 3.32(2.84 - 3.88)           | 105.42(88.44 - 124.57)           | 5.25(4.43 - 6.17)           | 161.97(126.34 - 213.69)          | 17.72(14.09 - 23.07)        |
| <b>Eastern Europe</b>               | 32.49(29.18 - 36.28)             | 10.03(9.02 - 11.18)         | 24.38(21.59 - 27.36)             | 7.07(6.26 - 7.93)           | 64.66(45.77 - 79.26)             | 48.80(34.95 - 59.51)        |
| <b>Eastern Sub-Saharan Africa</b>   | 3.30(2.72 - 4.09)                | 1.61(1.33 - 1.98)           | 4.62(3.95 - 5.44)                | 3.17(2.71 - 3.7)            | 16.32(12.86 - 20.22)             | 26.56(20.98 - 32.42)        |
| <b>High-income Asia Pacific</b>     | 17.69(15.15 - 20.21)             | 4.45(3.87 - 5.07)           | 35.42(29.62 - 41.17)             | 7.50(6.42 - 8.69)           | 67.98(52.43 - 91.27)             | 31.64(24.54 - 42.35)        |
| <b>High-income North America</b>    | 68.19(58.77 - 78.45)             | 11.72(10.12 - 13.47)        | 57.00(49.42 - 65.65)             | 8.98(7.77 - 10.35)          | 331.89(262.39 - 494.58)          | 113.02(89.54 - 168.18)      |
| <b>North Africa and Middle East</b> | 15.74(13.60 - 18.04)             | 3.18(2.76 - 3.62)           | 41.29(34.67 - 49.95)             | 9.55(8.09 - 11.41)          | 47.47(36.99 - 55.85)             | 23.71(18.52 - 27.88)        |
| <b>Oceania</b>                      | 0.10(0.08 - 0.13)                | 1.08(0.87 - 1.41)           | 0.17(0.13 - 0.22)                | 2.48(1.96 - 3.11)           | 0.66(0.48 - 0.84)                | 26.48(19.89 - 33.17)        |
| <b>South Asia</b>                   | 16.77(14.67 - 19.37)             | 1.13(0.99 - 1.31)           | 31.55(27.90 - 35.69)             | 2.38(2.10 - 2.69)           | 53.95(44.20 - 69.73)             | 9.26(7.62 - 11.98)          |
| <b>Southeast Asia</b>               | 16.45(13.38 - 20.84)             | 2.58(2.10 - 3.26)           | 16.34(14.19 - 19.14)             | 2.85(2.46 - 3.33)           | 44.47(34.33 - 52.6)              | 19.31(14.80 - 22.85)        |

|                                    |                      |                    |                         |                     |                         |                       |
|------------------------------------|----------------------|--------------------|-------------------------|---------------------|-------------------------|-----------------------|
| <b>Southern Latin America</b>      | 7.30(5.58 - 9.29)    | 9.05(6.92 - 11.57) | 5.97(4.74 - 7.48)       | 7.11(5.63 - 8.92)   | 19.52(14.60 - 27.16)    | 53.97(40.42 - 74.92)  |
| <b>Southern Sub-Saharan Africa</b> | 1.13(1.03 - 1.23)    | 1.87(1.70 - 2.02)  | 2.20(1.96 - 2.45)       | 4.04(3.61 - 4.48)   | 10.11(8.08 - 11.91)     | 53.16(41.87 - 60.83)  |
| <b>Tropical Latin America</b>      | 8.42(7.92 - 8.88)    | 3.54(3.34 - 3.74)  | 9.71(8.97 - 10.36)      | 4.09(3.76 - 4.37)   | 56.94(49.55 - 84.1)     | 54.94(47.67 - 81.28)  |
| <b>Western Europe</b>              | 75.60(66.61 - 85.73) | 9.31(8.20 - 10.59) | 138.24(119.20 - 159.26) | 14.93(12.82 - 17.3) | 325.49(267.13 - 469.92) | 78.67(64.34 - 113.34) |
| <b>Western Sub-Saharan Africa</b>  | 3.58(2.67 - 4.67)    | 1.20(0.98 - 1.47)  | 5.07(3.50 - 6.11)       | 2.93(2.05 - 3.49)   | 30.23(16.78 - 40.61)    | 43.52(24.40 - 57.94)  |

All data reported as number or rate (95% UI). *ASIR* age-standardized incidence rate; *UI* uncertainty interval



**Table S4** Regional deaths and age - standardized mortality rate of genitourinary cancers in 2019

| Region                              | Kidney cancer            |                             | Bladder cancer           |                             | Prostate cancer          |                             |
|-------------------------------------|--------------------------|-----------------------------|--------------------------|-----------------------------|--------------------------|-----------------------------|
|                                     | Deaths ( $\times 10^3$ ) | ASMR per 100,000 population | Deaths ( $\times 10^3$ ) | ASMR per 100,000 population | Deaths ( $\times 10^3$ ) | ASMR per 100,000 population |
| <b>Andean Latin America</b>         | 1.18(0.94 - 1.46)        | 2.12(1.69 - 2.63)           | 0.87(0.72 - 1.05)        | 1.63(1.33 - 1.97)           | 6.26(4.85 - 7.86)        | 25.50(19.68 - 32.03)        |
| <b>Australasia</b>                  | 1.71(1.54 - 1.89)        | 3.41(3.08 - 3.75)           | 1.63(1.43 - 1.81)        | 2.96(2.61 - 3.29)           | 5.41(4.43 - 7.64)        | 22.32(18.28 - 31.42)        |
| <b>Caribbean</b>                    | 0.99(0.83 - 1.16)        | 1.93(1.62 - 2.27)           | 1.52(1.31 - 1.75)        | 2.93(2.54 - 3.38)           | 9.83(7.85 - 12.06)       | 42.75(34.14 - 52.35)        |
| <b>Central Asia</b>                 | 2.06(1.87 - 2.29)        | 2.72(2.48 - 3.00)           | 1.60(1.44 - 1.77)        | 2.56(2.30 - 2.82)           | 2.57(2.06 - 3.06)        | 12.43(9.75 - 14.81)         |
| <b>Central Europe</b>               | 9.63(8.50 - 10.84)       | 4.52(3.99 - 5.11)           | 11.88(10.47 - 13.44)     | 5.29(4.66 - 5.99)           | 18.83(14.10 - 22.05)     | 21.56(16.05 - 25.11)        |
| <b>Central Latin America</b>        | 5.60(4.80 - 6.51)        | 2.38(2.04 - 2.76)           | 3.40(2.93 - 3.95)        | 1.51(1.30 - 1.76)           | 21.67(16.87 - 28.46)     | 22.11(17.32 - 29.24)        |
| <b>Central Sub - Saharan Africa</b> | 0.51(0.38 - 0.69)        | 0.89(0.66 - 1.25)           | 1.38(0.86 - 2.03)        | 3.35(2.06 - 4.93)           | 4.04(2.81 - 5.17)        | 29.92(20.54 - 38.38)        |
| <b>East Asia</b>                    | 25.49(21.43 - 29.95)     | 1.30(1.10 - 1.52)           | 42.16(36.02 - 49.35)     | 2.27(1.95 - 2.64)           | 57.21(45.38 - 74.04)     | 7.88(6.36 - 9.91)           |
| <b>Eastern Europe</b>               | 14.90(13.40 - 16.55)     | 4.36(3.92 - 4.84)           | 10.93(9.70 - 12.2)       | 3.11(2.75 - 3.47)           | 20.46(15.2 - 25.07)      | 17.53(12.95 - 21.71)        |
| <b>Eastern Sub - Saharan Africa</b> | 2.17(1.80 - 2.68)        | 1.27(1.05 - 1.56)           | 3.63(3.11 - 4.24)        | 2.74(2.35 - 3.19)           | 13.81(10.91 - 16.67)     | 24.80(19.56 - 29.64)        |
| <b>High - income Asia Pacific</b>   | 9.71(8.42 - 10.48)       | 2.00(1.79 - 2.13)           | 12.88(10.68 - 14.23)     | 2.26(1.92 - 2.47)           | 19.38(14.97 - 23.66)     | 8.60(6.67 - 10.53)          |
| <b>High - income North America</b>  | 22.00(20.41 - 23.15)     | 3.49(3.25 - 3.66)           | 25.76(23.43 - 27.45)     | 3.81(3.49 - 4.05)           | 54.85(46.83 - 79.75)     | 19.08(16.25 - 27.72)        |
| <b>North Africa and Middle East</b> | 6.00(5.16 - 6.89)        | 1.40(1.21 - 1.61)           | 15.46(13.17 - 18.42)     | 4.05(3.49 - 4.81)           | 19.09(15.24 - 22.50)     | 11.71(9.39 - 13.95)         |
| <b>Oceania</b>                      | 0.05(0.04 - 0.06)        | 0.64(0.50 - 0.85)           | 0.10(0.08 - 0.13)        | 1.82(1.44 - 2.27)           | 0.51(0.38 - 0.65)        | 24.18(18.15 - 30.53)        |
| <b>South Asia</b>                   | 10.86(9.5 - 12.53)       | 0.78(0.68 - 0.90)           | 21.99(19.47 - 24.71)     | 1.80(1.59 - 2.01)           | 42.22(35.17 - 54.87)     | 8.12(6.67 - 10.64)          |
| <b>Southeast Asia</b>               | 7.53(6.15 - 9.48)        | 1.27(1.04 - 1.60)           | 9.03(7.88 - 10.50)       | 1.76(1.53 - 2.03)           | 27.21(20.47 - 32.07)     | 13.56(10.27 - 15.97)        |

|                                      |                      |                   |                      |                   |                       |                      |
|--------------------------------------|----------------------|-------------------|----------------------|-------------------|-----------------------|----------------------|
| <b>Southern Latin America</b>        | 4.19(3.81 - 4.58)    | 5.05(4.59 - 5.51) | 3.07(2.81 - 3.30)    | 3.58(3.28 - 3.86) | 10.10(8.38 - 13.38)   | 29.53(24.42 - 38.78) |
| <b>Southern Sub - Saharan Africa</b> | 0.72(0.65 - 0.78)    | 1.30(1.18 - 1.40) | 1.49(1.31 - 1.66)    | 2.99(2.64 - 3.32) | 7.41(5.82 - 8.41)     | 45.08(34.35 - 50.53) |
| <b>Tropical Latin America</b>        | 4.72(4.41 - 4.99)    | 1.99(1.85 - 2.10) | 5.64(5.12 - 6.03)    | 2.45(2.21 - 2.62) | 23.90(20.37 - 34.73)  | 25.48(21.50 - 37.14) |
| <b>Western Europe</b>                | 34.36(31.51 - 36.30) | 3.65(3.40 - 3.83) | 50.51(45.16 - 54.46) | 4.78(4.32 - 5.14) | 95.77(79.23 - 133.05) | 21.60(17.88 - 29.78) |
| <b>Western Sub - Saharan Africa</b>  | 2.05(1.58 - 2.57)    | 0.86(0.71 - 1.02) | 3.81(2.66 - 4.52)    | 2.48(1.74 - 2.91) | 26.3(14.73 - 35.42)   | 41.74(23.48 - 55.68) |

All data reported as number or rate (95% UI). *ASMR* age - standardized mortality rate; *UI* uncertainty interval

**Table S5** Regional DALYs and age - standardized DALYs rate of genitourinary cancers in 2019

| Region                              | Kidney cancer               |                             | Bladder cancer               |                             | Prostate cancer               |                             |
|-------------------------------------|-----------------------------|-----------------------------|------------------------------|-----------------------------|-------------------------------|-----------------------------|
|                                     | DALYs ( $\times 10^3$ )     | ASDR per 100,000 population | DALYs ( $\times 10^3$ )      | ASDR per 100,000 population | DALYs ( $\times 10^3$ )       | ASDR per 100,000 population |
| <b>Andean Latin America</b>         | 31.13<br>(24.76 - 38.61)    | 53.62<br>(42.59 - 66.39)    | 16.30<br>(13.24 - 19.80)     | 29.49<br>(24.01 - 35.80)    | 101.03<br>(78.16 - 129.24)    | 397.17<br>(307.58 - 507.19) |
| <b>Australasia</b>                  | 35.15<br>(31.96 - 38.32)    | 77.88<br>(71.23 - 84.88)    | 25.85<br>(23.07 - 28.72)     | 50.81<br>(45.57 - 56.37)    | 1053.23<br>(840.97 - 1368.07) | 390.42<br>(323.54 - 552.32) |
| <b>Caribbean</b>                    | 28.27<br>(23.13 - 33.70)    | 56.56<br>(46.13 - 67.39)    | 28.60<br>(24.79 - 33.11)     | 55.28<br>(47.89 - 63.99)    | 429.03<br>(310.36 - 522.73)   | 704.84<br>(565.44 - 866.14) |
| <b>Central Asia</b>                 | 63.86<br>(57.32 - 71.31)    | 75.28<br>(67.94 - 83.53)    | 39.20<br>(35.20 - 43.68)     | 53.60<br>(48.20 - 59.36)    | 1033.62<br>(897.37 - 1515.66) | 209.81<br>(167.55 - 250.27) |
| <b>Central Europe</b>               | 215.43<br>(189.34 - 243.88) | 109.98<br>(96.51 - 124.60)  | 230.52<br>(201.86 - 262.13)  | 107.36<br>(93.95 - 122.07)  | 281.94<br>(220.71 - 345.22)   | 357.74<br>(264.07 - 417.95) |
| <b>Central Latin America</b>        | 154.32<br>(132.28 - 179.83) | 63.66<br>(54.61 - 74.10)    | 67.32<br>(57.82 - 78.82)     | 28.82<br>(24.72 - 33.71)    | 81.22<br>(57.40 - 104.03)     | 369.29<br>(289.00 - 482.77) |
| <b>Central Sub - Saharan Africa</b> | 18.59<br>(13.99 - 24.23)    | 23.94<br>(17.95 - 32.55)    | 33.21<br>(21.20 - 48.53)     | 65.11<br>(40.87 - 95.76)    | 93.66<br>(77.67 - 133.44)     | 469.77<br>(325.09 - 602.73) |
| <b>East Asia</b>                    | 679.56<br>(572.05 - 800.58) | 34.98<br>(29.69 - 40.58)    | 856.97<br>(729.75 - 1009.07) | 42.44<br>(36.28 - 49.64)    | 423.13<br>(367.76 - 615.83)   | 120.64<br>(96.98 - 153.79)  |
| <b>Eastern Europe</b>               | 376.93<br>(337.00 - 421.46) | 116.44<br>(104.17 - 129.80) | 231.53<br>(203.47 - 260.69)  | 67.13<br>(59.15 - 75.53)    | 378.32<br>(297.27 - 494.09)   | 336.41<br>(244.51 - 407.66) |
| <b>Eastern Sub - Saharan Africa</b> | 76.89<br>(62.81 - 95.71)    | 32.81<br>(27.10 - 40.54)    | 84.04<br>(71.43 - 99.34)     | 53.51<br>(45.83 - 62.70)    | 482.04<br>(271.56 - 654.18)   | 432.87<br>(342.49 - 523.92) |

|                                      |                             |                             |                             |                           |                                |                             |
|--------------------------------------|-----------------------------|-----------------------------|-----------------------------|---------------------------|--------------------------------|-----------------------------|
| <b>High - income Asia Pacific</b>    | 168.35<br>(153.45 - 178.77) | 43.16<br>(40.29 - 45.66)    | 185.46<br>(162.08 - 202.86) | 38.74<br>(34.73 - 42.25)  | 143.41<br>(113.29 - 165.24)    | 138.04<br>(112.79 - 177.07) |
| <b>High - income North America</b>   | 481.34<br>(453.06 - 506.24) | 82.97<br>(78.32 - 87.12)    | 433.84<br>(405.14 - 458.84) | 68.46<br>(64.26 - 72.24)  | 1499.83<br>(1261.99 - 2106.39) | 355.25<br>(308.31 - 519.22) |
| <b>North Africa and Middle East</b>  | 183.63<br>(157.59 - 211.82) | 37.23<br>(32.00 - 42.58)    | 378.67<br>(314.9 - 461.35)  | 86.17<br>(72.35 - 103.57) | 166.52<br>(133.66 - 205.11)    | 186.81<br>(147.72 - 219.52) |
| <b>Oceania</b>                       | 1.86<br>(1.43 - 2.44)       | 18.40<br>(14.46 - 24.04)    | 2.82<br>(2.18 - 3.68)       | 38.55<br>(30.03 - 49.23)  | 510.04<br>(381.79 - 602.06)    | 375.63<br>(279.62 - 475.23) |
| <b>South Asia</b>                    | 314.86<br>(276.23 - 363.81) | 20.64<br>(18.14 - 23.83)    | 487.70<br>(432.73 - 550.47) | 35.29<br>(31.13 - 39.71)  | 345.76<br>(270.78 - 404.98)    | 127.05<br>(105.59 - 164.67) |
| <b>Southeast Asia</b>                | 225.24<br>(181.85 - 284.4)  | 34.79<br>(28.13 - 43.89)    | 194.86<br>(169.28 - 229.27) | 33.19<br>(28.9 - 38.79)   | 329.83<br>(243.66 - 384.77)    | 218.62<br>(164.66 - 257.14) |
| <b>Southern Latin America</b>        | 99.60<br>(90.78 - 108.56)   | 124.32<br>(113.32 - 135.49) | 56.96<br>(52.39 - 61.51)    | 68.01<br>(62.64 - 73.45)  | 298.74<br>(243.71 - 380.29)    | 462.58<br>(387.30 - 614.38) |
| <b>Southern Sub - Saharan Africa</b> | 21.00<br>(18.90 - 22.96)    | 33.41<br>(30.19 - 36.36)    | 34.67<br>(30.37 - 39.31)    | 61.06<br>(53.81 - 68.9)   | 165.74<br>(139.82 - 220.45)    | 726.31<br>(574.70 - 822.50) |
| <b>Tropical Latin America</b>        | 126.91<br>(119.97 - 133.49) | 53.24<br>(50.28 - 56.02)    | 109.22<br>(101.21 - 116.27) | 45.60<br>(42.20 - 48.57)  | 763.89<br>(633.04 - 986.04)    | 417.24<br>(360.53 - 605.72) |
| <b>Western Europe</b>                | 654.12<br>(615.23 - 685.90) | 81.41<br>(77.10 - 85.24)    | 805.53<br>(736.60 - 871.05) | 86.82<br>(80.17 - 93.93)  | 53.79<br>(43.94 - 64.79)       | 349.18<br>(293.71 - 489.54) |
| <b>Western Sub - Saharan Africa</b>  | 95.78<br>(65.68 - 131.11)   | 26.58<br>(20.61 - 33.10)    | 89.31<br>(61.20 - 107.24)   | 48.18<br>(33.36 - 57.22)  | 10.10<br>(7.47 - 12.93)        | 661.04<br>(370.00 - 891.73) |

All data reported as number or rate (95% UI). *DALYs* disability - adjusted life - years; *ASDR* age - standardized DALYs rate; *UI* uncertainty interval

**Table S6** Incidence, mortality and DALYs of genitourinary cancers among the top three and bottom three countries in 2019

| Measure        | Type            | Sex           | Top three countries   |                       |                                   | Bottom three countries            |                 |                   |                   |
|----------------|-----------------|---------------|-----------------------|-----------------------|-----------------------------------|-----------------------------------|-----------------|-------------------|-------------------|
| Incident cases | Kidney cancer   | Both          | USA<br>(61,541.43)    | China<br>(59,826.74)  | Russian Federation<br>(22,381.03) | Tuvalu<br>(0.17)                  | Niue<br>(0.06)  | Tokelau<br>(0.02) |                   |
|                |                 | Male          | China<br>(42,553.79)  | USA<br>(40,685.52)    | Russian Federation<br>(12,868.30) | Tuvalu<br>(0.11)                  | Niue<br>(0.05)  | Tokelau<br>(0.01) |                   |
|                |                 | Female        | USA<br>(20,855.90)    | China<br>(17,272.96)  | Russian Federation<br>(9512.73)   | Nauru<br>(0.16)                   | Niue<br>(0.02)  | Tokelau<br>(0.01) |                   |
|                | Bladder cancer  | Both          | China<br>(100,020.20) | USA<br>(49,737.46)    | Italy<br>(28,608.02)              | Nauru<br>(0.22)                   | Niue<br>(0.09)  | Tokelau<br>(0.04) |                   |
|                |                 | Male          | China<br>(82,680.76)  | USA<br>(35,559.27)    | Italy<br>(23,003.22)              | Nauru<br>(0.13)                   | Niue<br>(0.06)  | Tokelau<br>(0.02) |                   |
|                |                 | Female        | China<br>(17,339.44)  | USA<br>(14,178.18)    | Japan<br>(7249.58)                | Nauru<br>(0.09)                   | Niue<br>(0.03)  | Tokelau<br>(0.02) |                   |
|                | Prostate cancer | Male          | USA<br>(308,584.29)   | China<br>(153,447.62) | Germany<br>(75,379.81)            | Niue<br>(0.50)                    | Nauru<br>(0.48) | Tokelau<br>(0.19) |                   |
|                | Deaths          | Kidney cancer | Both                  | China<br>(23,954.24)  | USA<br>(19,753.06)                | Russian Federation<br>(10,193.69) | Nauru<br>(0.07) | Niue<br>(0.03)    | Tokelau<br>(0.01) |
|                |                 |               | Male                  | China<br>(16,883.05)  | USA<br>(13,021.69)                | Russian Federation<br>(6152.43)   | Nauru<br>(0.05) | Niue<br>(0.02)    | Tokelau<br>(0.01) |
| Female         |                 |               | China<br>(7071.19)    | USA<br>(6731.37)      | Russian Federation<br>(4041.27)   | Nauru<br>(0.05)                   | Niue<br>(0.02)  | Tokelau<br>(0.01) |                   |
| Bladder cancer |                 | Both          | China<br>(40,094.24)  | USA<br>(22,767.44)    | India<br>(14,506.57)              | Nauru<br>(0.09)                   | Niue<br>(0.05)  | Tokelau<br>(0.02) |                   |
|                |                 | Male          | China<br>(31,504.64)  | USA<br>(16,352.97)    | India<br>(10,060.67)              | Nauru<br>(0.05)                   | Niue<br>(0.03)  | Tokelau<br>(0.01) |                   |
|                |                 | Female        | China                 | USA                   | India                             | Nauru                             | Niue            | Tokelau           |                   |

|                                |                 |        |                         |                     |                                    |                      |                                    |                            |
|--------------------------------|-----------------|--------|-------------------------|---------------------|------------------------------------|----------------------|------------------------------------|----------------------------|
|                                |                 |        | (8589.60)               | (6414.47)           | (4445.90)                          | (0.04)               | (0.02)                             | (0.01)                     |
|                                | Prostate cancer | Male   | China<br>(54,390.88)    | USA<br>(48,323.44)  | India<br>(32,107.15)               | Niue<br>(0.27)       | Nauru<br>(0.26)                    | Tokelau<br>(0.13)          |
| <b>DALYs</b>                   | Kidney cancer   | Both   | China<br>(642,799.34)   | USA<br>(434,447.43) | Russian Federation<br>(253,081.09) | Tuvalu<br>(2.65)     | Niue<br>(0.74)                     | Tokelau<br>(0.32)          |
|                                |                 | Male   | China<br>(462,868.56)   | USA<br>(297,788.77) | Russian Federation<br>(163,234.37) | Tuvalu<br>(1.75)     | Niue<br>(0.56)                     | Tokelau<br>(0.18)          |
|                                |                 | Female | China<br>(179,930.77)   | USA<br>(136,658.66) | Russian Federation<br>(89,846.73)  | Nauru<br>(0.78)      | Niue<br>(0.18)                     | Tokelau<br>(0.13)          |
|                                | Bladder cancer  | Both   | China<br>(816,119.14)   | USA<br>(384,236.57) | India<br>(313,585.91)              | Nauru<br>(2.88)      | Niue<br>(0.98)                     | Tokelau<br>(0.53)          |
|                                |                 | Male   | China<br>(651,102.48)   | USA<br>(281,706.04) | India<br>(217,921.25)              | Nauru<br>(1.64)      | Niue<br>(0.60)                     | Tokelau<br>(0.27)          |
|                                |                 | Female | China<br>(165,016.66)   | USA<br>(102,530.53) | India<br>(95,664.65)               | Palau<br>(1.11)      | Niue<br>(0.38)                     | Tokelau<br>(0.26)          |
|                                | Prostate cancer | Male   | China<br>(1,002,594.87) | USA<br>(926,634.87) | India<br>(580,128.20)              | Nauru<br>(6.09)      | Niue<br>(4.59)                     | Tokelau<br>(2.15)          |
| <b>ASIR (1/10<sup>5</sup>)</b> | Kidney cancer   | Both   | Czechia<br>(15.66)      | Estonia<br>(12.96)  | Iceland<br>(12.54)                 | Bangladesh<br>(0.86) | Papua New Guinea<br>(0.79)         | Niger<br>(0.74)            |
|                                |                 | Male   | Czechia<br>(22.25)      | Estonia<br>(19.85)  | Lithuania<br>(18.89)               | Kenya<br>(0.98)      | Papua New Guinea<br>(0.98)         | Niger<br>(0.79)            |
|                                |                 | Female | Czechia<br>(10.12)      | Monaco<br>(8.50)    | Finland<br>(8.27)                  | Bangladesh<br>(0.65) | Central African Republic<br>(0.61) | Papua New Guinea<br>(0.59) |
|                                | Bladder cancer  | Both   | Monaco<br>(31.92)       | Lebanon<br>(30.18)  | San Marino<br>(25.29)              | Bangladesh<br>(1.59) | Guatemala<br>(1.53)                | Nigeria<br>(1.39)          |
|                                |                 | Male   | Monaco<br>(54.30)       | Lebanon<br>(53.97)  | San Marino<br>(44.73)              | Bangladesh<br>(2.26) | Guatemala<br>(2.00)                | Nigeria<br>(1.91)          |
|                                |                 | Female | Monaco                  | Lebanon             | Zimbabwe                           | Nigeria              | Philippines                        | Bangladesh                 |

|                                |                 |        |                                   |                                          |                                  |                        |                            |                             |
|--------------------------------|-----------------|--------|-----------------------------------|------------------------------------------|----------------------------------|------------------------|----------------------------|-----------------------------|
|                                |                 |        | (12.54)                           | (10.75)                                  | (9.64)                           | (0.91)                 | (0.91)                     | (0.85)                      |
|                                | Prostate cancer | Male   | Saint Kitts and Nevis<br>(235.26) | United States Virgin Islands<br>(202.78) | Dominica<br>(195.69)             | Nepal<br>(9.80)        | India<br>(8.91)            | Bangladesh<br>(8.87)        |
| <b>ASMR (1/10<sup>5</sup>)</b> | Kidney cancer   | Both   | Uruguay<br>(6.56)                 | Czechia<br>(6.42)                        | Greenland<br>(6.31)              | Bangladesh<br>(0.59)   | Niger<br>(0.55)            | Papua New Guinea<br>(0.49)  |
|                                |                 | Male   | Uruguay<br>(10.37)                | Czechia<br>(9.67)                        | Lithuania<br>(9.06)              | Bangladesh<br>(0.76)   | Papua New Guinea<br>(0.63) | Niger<br>(0.59)             |
|                                |                 | Female | Greenland<br>(4.55)               | Czechia<br>(3.92)                        | Uruguay<br>(3.73)                | Vanuatu<br>(0.45)      | Bangladesh<br>(0.41)       | Papua New Guinea<br>(0.34)  |
|                                | Bladder cancer  | Both   | Lebanon<br>(10.38)                | Mali<br>(10.06)                          | Monaco<br>(9.44)                 | El Salvador<br>(1.11)  | Albania<br>(1.08)          | Palau<br>(1.03)             |
|                                |                 | Male   | Lebanon<br>(17.45)                | Monaco<br>(16.05)                        | Mali<br>(14.73)                  | Guatemala<br>(1.50)    | El Salvador<br>(1.49)      | Albania<br>(1.47)           |
|                                |                 | Female | Zimbabwe<br>(7.92)                | Malawi<br>(6.16)                         | Qatar<br>(5.15)                  | Turkmenistan<br>(0.64) | Sri Lanka<br>(0.62)        | Palau<br>(0.59)             |
|                                | Prostate cancer | Male   | Dominica<br>(126.28)              | Grenada<br>(98.79)                       | Saint Kitts and Nevis<br>(97.13) | India<br>(7.75)        | Sri Lanka<br>(7.39)        | Egypt<br>(7.01)             |
| <b>ASDR (1/10<sup>5</sup>)</b> | Kidney cancer   | Both   | Uruguay<br>(166.63)               | Greenland<br>(148.46)                    | Czechia<br>(144.85)              | Niger<br>(16.95)       | Bangladesh<br>(15.62)      | Papua New Guinea<br>(14.81) |
|                                |                 | Male   | Uruguay<br>(254.19)               | Lithuania<br>(219.46)                    | Ukraine<br>(215.93)              | Bangladesh<br>(19.56)  | Niger<br>(19.44)           | Papua New Guinea<br>(18.72) |
|                                |                 | Female | Greenland<br>(104.13)             | Uruguay<br>(95.31)                       | Czechia<br>(84.77)               | Vanuatu<br>(12.57)     | Bangladesh<br>(11.41)      | Papua New Guinea<br>(10.59) |
|                                | Bladder cancer  | Both   | Egypt<br>(201.75)                 | Mali<br>(197.04)                         | Lebanon<br>(192.75)              | El Salvador<br>(20.82) | Guatemala<br>(20.77)       | Albania<br>(20.70)          |
|                                |                 | Male   | Lebanon<br>(322.16)               | Egypt<br>(310.81)                        | Monaco<br>(288.99)               | Albania<br>(27.67)     | El Salvador<br>(27.59)     | Guatemala<br>(26.30)        |

|                 |        |                       |                                    |                      |                     |                   |                        |
|-----------------|--------|-----------------------|------------------------------------|----------------------|---------------------|-------------------|------------------------|
|                 | Female | Zimbabwe<br>(164.14)  | Malawi<br>(121.52)                 | Mali<br>(103.32)     | Paraguay<br>(11.94) | Palau<br>(11.13)  | Sri Lanka<br>(10.91)   |
| Prostate cancer | Male   | Dominica<br>(1923.95) | Saint Kitts and Nevis<br>(1607.79) | Grenada<br>(1596.00) | Egypt<br>(119.06)   | China<br>(118.94) | Bangladesh<br>(118.34) |

*DALYs* disability-adjusted life-years; *ASIR* age-standardized incidence rate; *ASMR* age-standardized mortality rate; *ASDR* age-standardized DALYs rate



**Table S7** EAPC of ASMR for genitourinary cancers in 204 countries and territories from 1990 to 2019

| <b>Location</b>            | <b>EAPC (95% CI)</b>  |                       |                        |
|----------------------------|-----------------------|-----------------------|------------------------|
|                            | <b>Kidney cancer</b>  | <b>Bladder cancer</b> | <b>Prostate cancer</b> |
| <b>Afghanistan</b>         | 0.89(0.67 - 1.10)     | -0.44(-0.47 to -0.40) | 0.26(0.21 - 0.32)      |
| <b>Albania</b>             | 2.14(1.83 - 2.46)     | -0.28(-0.44 to -0.12) | -0.10(-0.22 - 0.01)    |
| <b>Algeria</b>             | 0.69(0.57 - 0.82)     | -0.75(-1.06 to -0.43) | -0.67(-0.71 to -0.62)  |
| <b>American Samoa</b>      | 0.01(-0.34 - 0.35)    | 1.58(1.29 - 1.87)     | 0.24(0.11 - 0.36)      |
| <b>Andorra</b>             | 0.15(0.09 - 0.21)     | -0.95(-1.01 to -0.89) | -0.58(-0.63 to -0.53)  |
| <b>Angola</b>              | 1.26(1.14 - 1.37)     | -0.22(-0.27 to -0.18) | 0.75(0.71 - 0.79)      |
| <b>Antigua and Barbuda</b> | -0.54(-0.98 to -0.10) | 0.67(0.44 - 0.89)     | 0.25(-0.10 - 0.59)     |
| <b>Argentina</b>           | -0.31(-0.54 to -0.08) | -1.10(-1.20 to -1.00) | -0.22(-0.46 - 0.03)    |
| <b>Armenia</b>             | 5.74(4.84 - 6.65)     | -0.05(-0.27 - 0.16)   | 1.75(1.63 - 1.86)      |
| <b>Australia</b>           | -0.53(-0.62 to -0.44) | -1.05(-1.17 to -0.93) | -1.48(-1.63 to -1.33)  |
| <b>Austria</b>             | -1.37(-1.47 to -1.26) | -1.02(-1.11 to -0.94) | -1.41(-1.57 to -1.25)  |
| <b>Azerbaijan</b>          | 0.32(0.04 - 0.60)     | 0.83(0.72 - 0.94)     | 0.92(0.81 - 1.04)      |
| <b>Bahamas</b>             | -0.69(-0.94 to -0.43) | 0.21(0.08 - 0.33)     | -0.01(-0.20 - 0.18)    |
| <b>Bahrain</b>             | -0.90(-1.34 to -0.46) | -1.87(-2.09 to -1.65) | -0.46(-0.72 to -0.19)  |
| <b>Bangladesh</b>          | 0.56(0.44 - 0.69)     | -0.30(-0.48 to -0.12) | -0.44(-0.61 to -0.26)  |
| <b>Barbados</b>            | -0.87(-1.20 to -0.54) | 0.37(0.26 - 0.49)     | 0.01(-0.32 - 0.34)     |
| <b>Belarus</b>             | 3.88(2.90 - 4.86)     | -1.41(-1.86 to -0.95) | 0.62(0.44 - 0.80)      |
| <b>Belgium</b>             | -0.11(-0.33 - 0.12)   | -1.15(-1.43 to -0.88) | -2.16(-2.27 to -2.04)  |

---

|                                         |                       |                       |                       |
|-----------------------------------------|-----------------------|-----------------------|-----------------------|
| <b>Belize</b>                           | -0.14(-0.27 - 0.01)   | 0.79(0.43 - 1.15)     | 0.81(0.24 - 1.39)     |
| <b>Benin</b>                            | 1.34(1.21 - 1.48)     | -1.90(-2.03 to -1.78) | 1.86(1.68 - 2.03)     |
| <b>Bermuda</b>                          | -2.00(-2.42 to -1.58) | -0.91(-1.09 to -0.72) | -0.26(-0.36 to -0.17) |
| <b>Bhutan</b>                           | 2.22(2.15 - 2.30)     | 0.85(0.80 - 0.89)     | 1.04(0.98 - 1.10)     |
| <b>Bolivia (Plurinational State of)</b> | 1.58(1.53 - 1.64)     | 0.15(0.06 - 0.25)     | 0.80(0.74 - 0.85)     |
| <b>Bosnia and Herzegovina</b>           | 2.28(2.01 - 2.55)     | 1.59(1.36 - 1.81)     | 1.30(1.04 - 1.56)     |
| <b>Botswana</b>                         | 1.43(1.02 - 1.83)     | -0.31(-0.59 to -0.02) | 0.22(-0.20 - 0.64)    |
| <b>Brazil</b>                           | 1.15(1.05 - 1.24)     | -0.41(-0.45 to -0.37) | -0.28(-0.51 to -0.05) |
| <b>Brunei Darussalam</b>                | 1.70(1.47 - 1.93)     | -0.08(-0.25 - 0.09)   | 1.93(1.48 - 2.38)     |
| <b>Bulgaria</b>                         | 5.83(4.92 - 6.75)     | 2.15(1.74 - 2.57)     | 2.07(1.78 - 2.36)     |
| <b>Burkina Faso</b>                     | 1.26(1.14 - 1.38)     | -2.19(-2.42 to -1.95) | 1.93(1.82 - 2.05)     |
| <b>Burundi</b>                          | 0.27(0.21 - 0.33)     | -1.59(-1.72 to -1.47) | -0.19(-0.25 to -0.14) |
| <b>Cabo Verde</b>                       | 4.32(3.65 - 4.99)     | 2.58(1.87 - 3.30)     | 2.53(1.74 - 3.33)     |
| <b>Cambodia</b>                         | 1.50(1.44 - 1.57)     | -0.09(-0.27 - 0.08)   | 1.18(1.11 - 1.25)     |
| <b>Cameroon</b>                         | 0.82(0.77 - 0.86)     | -1.12(-1.23 to -1.01) | 1.90(1.74 - 2.06)     |
| <b>Canada</b>                           | 1.04(0.78 - 1.30)     | -0.98(-1.07 to -0.88) | -2.30(-2.52 to -2.08) |
| <b>Central African Republic</b>         | 0.26(0.17 - 0.35)     | -0.90(-0.95 to -0.86) | 0.01(-0.03 - 0.05)    |
| <b>Chad</b>                             | 1.36(1.29 - 1.43)     | -0.59(-0.72 to -0.47) | 2.27(2.07 - 2.48)     |
| <b>Chile</b>                            | 0.62(0.51 - 0.73)     | -0.03(-0.11 - 0.06)   | 0.31(0.05 - 0.57)     |
| <b>China</b>                            | 2.79(2.35 - 3.24)     | -0.53(-0.58 to -0.49) | -0.22(-0.26 to -0.17) |
| <b>Colombia</b>                         | 0.62(0.53 - 0.71)     | -1.66(-1.80 to -1.52) | -1.20(-1.44 to -0.96) |
| <b>Comoros</b>                          | 1.10(1.00 - 1.19)     | -0.44(-0.56 to -0.32) | 0.10(0.02 - 0.17)     |

---

---

|                                              |                       |                       |                       |
|----------------------------------------------|-----------------------|-----------------------|-----------------------|
| <b>Congo</b>                                 | 0.46(0.28 - 0.65)     | -0.56(-0.77 to -0.35) | 0.01(-0.14 - 0.15)    |
| <b>Cook Islands</b>                          | 0.08(-0.07 - 0.23)    | -0.04(-0.21 - 0.13)   | -0.84(-0.90 to -0.77) |
| <b>Costa Rica</b>                            | 1.79(1.59 - 1.99)     | -0.46(-0.63 to -0.30) | 0.63(0.30 - 0.96)     |
| <b>Croatia</b>                               | 3.85(3.22 - 4.48)     | 0.44(0.30 - 0.57)     | 0.30(0.12 - 0.47)     |
| <b>Cuba</b>                                  | -0.77(-1.20 to -0.32) | 0.46(0.32 - 0.60)     | 0.62(0.55 - 0.70)     |
| <b>Cyprus</b>                                | 2.66(2.33 - 3.00)     | -0.45(-0.66 to -0.24) | 0.25(-0.13 - 0.64)    |
| <b>Czechia</b>                               | 0.60(0.14 - 1.06)     | -0.48(-0.59 to -0.38) | -0.30(-0.58 to -0.03) |
| <b>Cote d'Ivoire</b>                         | 0.62(0.52 - 0.72)     | -1.80(-1.94 to -1.66) | 1.67(1.51 - 1.83)     |
| <b>Democratic People's Republic of Korea</b> | 0.58(0.51 - 0.66)     | -0.44(-0.49 to -0.40) | 0.20(0.10 - 0.30)     |
| <b>Democratic Republic of the Congo</b>      | -0.13(-0.39 - 0.14)   | -1.37(-1.56 to -1.18) | 0.14(0.10 - 0.18)     |
| <b>Denmark</b>                               | 0.53(-0.02 - 1.08)    | -0.76(-1.20 to -0.31) | -0.46(-0.65 to -0.27) |
| <b>Djibouti</b>                              | 2.30(2.19 - 2.41)     | 0.20(0.16 - 0.24)     | 0.46(0.42 - 0.50)     |
| <b>Dominica</b>                              | -0.10(-0.46 - 0.26)   | 0.78(0.66 - 0.91)     | 0.70(0.52 - 0.88)     |
| <b>Dominican Republic</b>                    | 2.11(1.57 - 2.66)     | 1.50(1.29 - 1.71)     | 1.42(0.86 - 1.99)     |
| <b>Ecuador</b>                               | 1.93(1.54 - 2.33)     | 0.56(0.25 - 0.87)     | 0.81(0.59 - 1.03)     |
| <b>Egypt</b>                                 | 1.80(1.63 - 1.96)     | 0.34(0.23 - 0.45)     | 0.23(0.07 - 0.39)     |
| <b>El Salvador</b>                           | 1.43(1.28 - 1.58)     | 0.24(0.11 - 0.37)     | 0.92(0.49 - 1.34)     |
| <b>Equatorial Guinea</b>                     | 3.93(3.70 - 4.17)     | 1.11(0.94 - 1.27)     | 1.29(1.21 - 1.36)     |
| <b>Eritrea</b>                               | 1.81(1.52 - 2.11)     | 0.11(-0.10 - 0.33)    | 0.12(-0.12 - 0.36)    |
| <b>Estonia</b>                               | 3.67(2.91 - 4.43)     | -0.10(-0.28 - 0.07)   | 1.47(1.22 - 1.71)     |
| <b>Eswatini</b>                              | 1.50(0.79 - 2.21)     | 0.37(0.12 - 0.62)     | 0.87(0.62 - 1.12)     |
| <b>Ethiopia</b>                              | 0.44(0.18 - 0.71)     | -0.51(-0.60 to -0.42) | 0.73(0.63 - 0.83)     |

---

---

|                      |                       |                       |                       |
|----------------------|-----------------------|-----------------------|-----------------------|
| <b>Fiji</b>          | 0.44(0.31 - 0.57)     | 1.03(0.79 - 1.27)     | 0.70(0.52 - 0.87)     |
| <b>Finland</b>       | -0.29(-0.37 to -0.21) | -1.29(-1.37 to -1.20) | -1.32(-1.49 to -1.16) |
| <b>France</b>        | -0.15(-0.24 to -0.05) | -0.89(-0.92 to -0.86) | -2.17(-2.35 to -2.00) |
| <b>Gabon</b>         | 1.53(1.44 - 1.62)     | -0.35(-0.43 to -0.27) | 0.57(0.53 - 0.62)     |
| <b>Gambia</b>        | 1.41(1.26 - 1.57)     | 0.49(0.36 - 0.61)     | 0.73(0.64 - 0.82)     |
| <b>Georgia</b>       | 2.09(1.62 - 2.56)     | 2.13(1.75 - 2.51)     | 2.53(1.95 - 3.11)     |
| <b>Germany</b>       | -0.09(-0.21 - 0.04)   | -1.30(-1.58 to -1.01) | -1.12(-1.28 to -0.96) |
| <b>Ghana</b>         | -0.05(-0.33 - 0.22)   | -1.22(-1.39 to -1.04) | -0.36(-0.54 to -0.18) |
| <b>Greece</b>        | -0.05(-0.25 - 0.14)   | -1.10(-1.24 to -0.96) | -1.09(-1.38 to -0.79) |
| <b>Greenland</b>     | 1.30(0.94 - 1.67)     | -1.20(-1.32 to -1.08) | 0.03(-0.06 - 0.12)    |
| <b>Grenada</b>       | 0.06(-0.40 - 0.52)    | 0.66(0.47 - 0.84)     | 0.89(0.06 - 1.73)     |
| <b>Guam</b>          | -1.20(-1.51 to -0.90) | 0.10(-0.18 - 0.39)    | -0.78(-1.14 to -0.42) |
| <b>Guatemala</b>     | 1.52(0.99 - 2.06)     | -0.71(-0.83 to -0.59) | 1.66(0.96 - 2.36)     |
| <b>Guinea</b>        | 1.07(1.01 - 1.14)     | 0.40(0.31 - 0.49)     | 0.97(0.82 - 1.12)     |
| <b>Guinea-Bissau</b> | 0.54(0.46 - 0.62)     | -1.44(-1.55 to -1.33) | 1.91(1.76 - 2.05)     |
| <b>Guyana</b>        | -0.42(-0.70 to -0.15) | 0.19(0.11 - 0.26)     | 0.21(0.05 - 0.36)     |
| <b>Haiti</b>         | -0.57(-0.85 to -0.29) | -0.14(-0.26 to -0.02) | 0.20(0.18 - 0.22)     |
| <b>Honduras</b>      | 2.59(2.43 - 2.76)     | 1.73(1.54 - 1.93)     | 1.65(1.32 - 1.98)     |
| <b>Hungary</b>       | -0.13(-0.43 - 0.18)   | -0.15(-0.32 - 0.02)   | -0.90(-1.08 to -0.71) |
| <b>Iceland</b>       | -0.21(-0.45 - 0.04)   | -1.37(-1.50 to -1.25) | -1.07(-1.30 to -0.85) |
| <b>India</b>         | 1.30(1.20 - 1.40)     | -0.26(-0.37 to -0.14) | -0.29(-0.39 to -0.18) |
| <b>Indonesia</b>     | 2.50(2.44 - 2.57)     | 0.56(0.50 - 0.62)     | 1.92(1.83 - 2.01)     |

---

|                                         |                       |                       |                       |
|-----------------------------------------|-----------------------|-----------------------|-----------------------|
| <b>Iran (Islamic Republic of)</b>       | 1.23(1.00 - 1.46)     | 0.18(0.12 - 0.24)     | 0.51(0.31 - 0.72)     |
| <b>Iraq</b>                             | 1.54(1.27 - 1.80)     | 0.97(0.72 - 1.23)     | 0.63(0.49 - 0.77)     |
| <b>Ireland</b>                          | 0.74(0.48 - 1.01)     | -0.59(-0.78 to -0.39) | -1.27(-1.50 to -1.05) |
| <b>Israel</b>                           | -0.22(-0.48 - 0.05)   | -0.57(-0.75 to -0.38) | -1.74(-1.99 to -1.49) |
| <b>Italy</b>                            | -0.12(-0.17 to -0.07) | -1.29(-1.36 to -1.22) | -1.02(-1.21 to -0.82) |
| <b>Jamaica</b>                          | -0.85(-1.32 to -0.37) | -0.40(-0.69 to -0.11) | 1.90(1.34 - 2.46)     |
| <b>Japan</b>                            | 0.38(0.24 - 0.51)     | -0.60(-0.68 to -0.53) | -0.50(-0.59 to -0.42) |
| <b>Jordan</b>                           | 2.33(2.09 - 2.58)     | -0.39(-0.53 to -0.26) | 0.31(0.06 - 0.57)     |
| <b>Kazakhstan</b>                       | 0.06(-0.37 - 0.50)    | -0.50(-0.92 to -0.08) | 0.67(0.53 - 0.81)     |
| <b>Kenya</b>                            | 2.88(2.68 - 3.09)     | 1.40(1.21 - 1.58)     | 1.98(1.77 - 2.19)     |
| <b>Kiribati</b>                         | 0.19(-0.05 - 0.42)    | -0.07(-0.10 to -0.03) | -0.40(-0.58 to -0.23) |
| <b>Kuwait</b>                           | 0.26(-0.30 - 0.82)    | -0.10(-0.46 - 0.27)   | 0.94(0.59 - 1.28)     |
| <b>Kyrgyzstan</b>                       | 1.31(0.83 - 1.79)     | -0.38(-0.73 to -0.03) | -0.83(-1.04 to -0.62) |
| <b>Lao People's Democratic Republic</b> | 0.95(0.91 - 0.98)     | -0.82(-0.96 to -0.67) | 0.41(0.36 - 0.45)     |
| <b>Latvia</b>                           | 3.65(2.92 - 4.38)     | 0.74(0.51 - 0.97)     | 1.82(1.45 - 2.19)     |
| <b>Lebanon</b>                          | 2.73(2.48 - 2.99)     | -0.44(-0.49 to -0.39) | 0.70(0.57 - 0.83)     |
| <b>Lesotho</b>                          | 2.96(2.76 - 3.16)     | 1.42(1.25 - 1.58)     | 1.31(1.08 - 1.55)     |
| <b>Liberia</b>                          | 1.10(0.62 - 1.59)     | -1.96(-2.06 to -1.86) | 1.80(1.62 - 1.99)     |
| <b>Libya</b>                            | 1.37(1.24 - 1.50)     | 0.14(0.02 - 0.26)     | 0.29(0.21 - 0.37)     |
| <b>Lithuania</b>                        | 3.42(2.69 - 4.16)     | -0.48(-0.71 to -0.25) | 1.79(1.28 - 2.31)     |
| <b>Luxembourg</b>                       | -0.91(-1.01 to -0.82) | -1.10(-1.15 to -1.04) | -2.11(-2.21 to -2.01) |
| <b>Madagascar</b>                       | 0.87(0.80 - 0.94)     | -1.21(-1.38 to -1.04) | -0.38(-0.52 to -0.25) |

---

|                                         |                       |                       |                       |
|-----------------------------------------|-----------------------|-----------------------|-----------------------|
| <b>Malawi</b>                           | 1.06(0.97 - 1.16)     | -0.22(-0.31 to -0.14) | 0.86(0.75 - 0.98)     |
| <b>Malaysia</b>                         | 1.54(1.42 - 1.67)     | -0.5(-0.77 to -0.23)  | 0.02(-0.22 - 0.25)    |
| <b>Maldives</b>                         | 0.75(0.53 - 0.97)     | -1.47(-1.59 to -1.34) | 0.06(-0.03 - 0.16)    |
| <b>Mali</b>                             | 1.14(1.07 - 1.20)     | -0.08(-0.15 to -0.01) | 0.70(0.66 - 0.75)     |
| <b>Malta</b>                            | 0.20(0.05 - 0.35)     | -1.50(-1.58 to -1.42) | -1.41(-1.55 to -1.27) |
| <b>Marshall Islands</b>                 | 0.57(0.45 - 0.68)     | 0.54(0.42 - 0.66)     | 0.01(-0.20 - 0.22)    |
| <b>Mauritania</b>                       | 0.43(0.35 - 0.51)     | -1.92(-2.03 to -1.81) | 1.55(1.39 - 1.70)     |
| <b>Mauritius</b>                        | 1.67(1.41 - 1.93)     | -1.65(-1.92 to -1.38) | 0.27(-0.05 - 0.60)    |
| <b>Mexico</b>                           | 1.07(1.00 - 1.15)     | -0.32(-0.40 to -0.23) | -0.17(-0.28 to -0.07) |
| <b>Micronesia (Federated States of)</b> | 0.26(0.13 - 0.39)     | 0.57(0.53 - 0.62)     | 0.55(0.47 - 0.64)     |
| <b>Monaco</b>                           | 0.89(0.70 - 1.09)     | 0.71(0.67 - 0.75)     | -0.29(-0.36 to -0.22) |
| <b>Mongolia</b>                         | 3.14(2.85 - 3.42)     | -2.80(-3.24 to -2.36) | 0.01(-0.15 - 0.16)    |
| <b>Montenegro</b>                       | 1.38(1.30 - 1.46)     | 0.51(0.43 - 0.58)     | 0.81(0.72 - 0.89)     |
| <b>Morocco</b>                          | 1.77(1.56 - 1.99)     | 0.58(0.30 - 0.86)     | 0.60(0.16 - 1.05)     |
| <b>Mozambique</b>                       | 2.43(2.29 - 2.56)     | -0.15(-0.27 to -0.03) | 1.17(1.11 - 1.23)     |
| <b>Myanmar</b>                          | 1.51(1.44 - 1.58)     | -0.73(-0.79 to -0.67) | 0.76(0.73 - 0.78)     |
| <b>Namibia</b>                          | 1.71(1.49 - 1.92)     | 0.27(0.06 - 0.47)     | 2.08(1.95 - 2.21)     |
| <b>Nauru</b>                            | -0.33(-0.49 to -0.16) | 0.30(0.18 - 0.41)     | 0.58(0.44 - 0.72)     |
| <b>Nepal</b>                            | 2.41(2.17 - 2.65)     | 0.56(0.43 - 0.68)     | 0.97(0.83 - 1.12)     |
| <b>Netherlands</b>                      | 0.32(0.15 - 0.48)     | -0.39(-0.56 to -0.23) | -0.99(-1.14 to -0.84) |
| <b>New Zealand</b>                      | 0.09(-0.05 - 0.23)    | -1.47(-1.65 to -1.30) | -1.61(-1.78 to -1.44) |
| <b>Nicaragua</b>                        | 2.12(1.81 - 2.44)     | 0.14(-0.23 - 0.52)    | 0.58(0.36 - 0.79)     |

---

---

|                                 |                       |                       |                       |
|---------------------------------|-----------------------|-----------------------|-----------------------|
| <b>Niger</b>                    | 0.03(-0.06 - 0.11)    | -1.61(-1.75 to -1.48) | 2.13(1.96 - 2.30)     |
| <b>Nigeria</b>                  | 1.29(1.21 - 1.38)     | 0.75(0.63 - 0.87)     | 1.17(1.05 - 1.30)     |
| <b>Niue</b>                     | 0.70(0.50 - 0.89)     | 0.32(0.25 - 0.39)     | 0.62(0.57 - 0.67)     |
| <b>North Macedonia</b>          | 4.18(3.66 - 4.71)     | 0.66(0.46 - 0.86)     | 1.53(1.32 - 1.74)     |
| <b>Northern Mariana Islands</b> | -0.32(-0.77 - 0.14)   | 3.22(2.62 - 3.84)     | 1.20(0.98 - 1.42)     |
| <b>Norway</b>                   | 0.29(0.10 - 0.47)     | -1.10(-1.16 to -1.04) | -0.90(-1.08 to -0.73) |
| <b>Oman</b>                     | 2.94(2.62 - 3.25)     | 0.70(0.51 - 0.90)     | 0.48(0.36 - 0.60)     |
| <b>Pakistan</b>                 | 2.01(1.76 - 2.26)     | 0.48(0.35 - 0.60)     | 0.55(0.41 - 0.69)     |
| <b>Palau</b>                    | 0.69(0.50 - 0.89)     | 0.05(-0.01 - 0.10)    | -0.08(-0.15 to -0.01) |
| <b>Palestine</b>                | 1.11(0.92 - 1.30)     | -0.56(-0.63 to -0.49) | -0.15(-0.28 to -0.01) |
| <b>Panama</b>                   | 2.57(2.37 - 2.77)     | -1.19(-1.38 to -1.01) | 0.47(0.02 - 0.93)     |
| <b>Papua New Guinea</b>         | 0.56(0.47 - 0.65)     | 0.92(0.87 - 0.96)     | 1.08(1.02 - 1.14)     |
| <b>Paraguay</b>                 | 0.43(0.30 - 0.55)     | 0.61(0.49 - 0.73)     | 1.18(0.78 - 1.59)     |
| <b>Peru</b>                     | 0.01(-0.23 - 0.25)    | -0.70(-0.86 to -0.53) | 0.21(0.07 - 0.36)     |
| <b>Philippines</b>              | 0.59(0.39 - 0.79)     | -0.78(-1.01 to -0.55) | -0.20(-0.40 - 0.01)   |
| <b>Poland</b>                   | 3.76(2.78 - 4.74)     | 0.44(0.29 - 0.60)     | 0.67(0.38 - 0.96)     |
| <b>Portugal</b>                 | 0.05(-0.16 - 0.25)    | -0.46(-0.53 to -0.39) | -1.56(-1.76 to -1.36) |
| <b>Puerto Rico</b>              | -0.23(-0.44 to -0.01) | -0.42(-0.56 to -0.29) | -1.41(-1.54 to -1.28) |
| <b>Qatar</b>                    | 1.12(0.80 - 1.44)     | 1.99(1.70 - 2.28)     | 1.02(0.57 - 1.47)     |
| <b>Republic of Korea</b>        | 1.77(1.16 - 2.39)     | -1.30(-1.53 to -1.08) | 0.14(-0.05 - 0.32)    |
| <b>Republic of Moldova</b>      | 2.01(1.63 - 2.39)     | -0.31(-0.59 to -0.02) | 1.39(0.98 - 1.81)     |
| <b>Romania</b>                  | 2.04(1.95 - 2.13)     | 0.68(0.56 - 0.80)     | 0.88(0.76 - 1.00)     |

---

|                                         |                       |                       |                       |
|-----------------------------------------|-----------------------|-----------------------|-----------------------|
| <b>Russian Federation</b>               | 0.25(0.02 - 0.48)     | -0.62(-0.97 to -0.26) | 1.48(1.35 - 1.60)     |
| <b>Rwanda</b>                           | 0.51(0.27 - 0.75)     | -1.61(-1.84 to -1.37) | -0.13(-0.33 - 0.08)   |
| <b>Saint Kitts and Nevis</b>            | -1.63(-2.15 to -1.10) | -0.09(-0.27 - 0.08)   | 0.64(0.52 - 0.77)     |
| <b>Saint Lucia</b>                      | -1.32(-1.77 to -0.87) | -0.63(-0.88 to -0.37) | -0.64(-0.88 to -0.40) |
| <b>Saint Vincent and the Grenadines</b> | -0.85(-1.37 to -0.34) | 0.56(0.31 - 0.81)     | 0.41(0.19 - 0.62)     |
| <b>Samoa</b>                            | -0.19(-0.30 to -0.09) | 0.03(-0.02 - 0.08)    | -0.57(-0.76 to -0.38) |
| <b>San Marino</b>                       | 0.67(0.58 - 0.75)     | -0.05(-0.13 - 0.04)   | -0.51(-0.55 to -0.46) |
| <b>Sao Tome and Principe</b>            | 1.30(1.06 - 1.53)     | 1.18(1.11 - 1.25)     | 1.39(1.23 - 1.55)     |
| <b>Saudi Arabia</b>                     | 2.57(2.32 - 2.83)     | -1.11(-1.46 to -0.77) | -1.04(-1.28 to -0.80) |
| <b>Senegal</b>                          | 0.89(0.72 - 1.06)     | -1.34(-1.44 to -1.25) | 2.09(1.90 - 2.27)     |
| <b>Serbia</b>                           | 1.39(1.24 - 1.54)     | 0.67(0.57 - 0.78)     | 1.39(1.13 - 1.65)     |
| <b>Seychelles</b>                       | 0.75(0.30 - 1.21)     | 0.14(-0.06 - 0.34)    | 1.05(0.72 - 1.38)     |
| <b>Sierra Leone</b>                     | 0.81(0.65 - 0.97)     | -2.25(-2.42 to -2.08) | 1.94(1.77 - 2.12)     |
| <b>Singapore</b>                        | 0.14(-0.01 - 0.30)    | -2.31(-2.55 to -2.07) | -0.63(-0.81 to -0.45) |
| <b>Slovakia</b>                         | 1.79(1.44 - 2.13)     | 0.05(-0.2 - 0.31)     | 0.73(0.57 - 0.88)     |
| <b>Slovenia</b>                         | 1.89(1.56 - 2.22)     | -0.21(-0.36 to -0.05) | 0.67(0.38 - 0.95)     |
| <b>Solomon Islands</b>                  | 0.52(0.29 - 0.75)     | 0.71(0.64 - 0.77)     | 0.67(0.63 - 0.71)     |
| <b>Somalia</b>                          | 0.80(0.71 - 0.89)     | -0.38(-0.41 to -0.34) | -0.07(-0.13 to -0.02) |
| <b>South Africa</b>                     | 0.73(0.53 - 0.93)     | -0.20(-0.48 - 0.08)   | 0.64(0.42 - 0.86)     |
| <b>South Sudan</b>                      | 0.82(0.74 - 0.90)     | -0.33(-0.39 to -0.27) | -0.04(-0.07 - 0.01)   |
| <b>Spain</b>                            | 0.78(0.72 - 0.83)     | -0.73(-0.79 to -0.67) | -1.6(-1.74 to -1.46)  |
| <b>Sri Lanka</b>                        | -2.14(-3.12 to -1.14) | 1.28(1.00 - 1.55)     | 0.17(0.03 - 0.31)     |



|                                    |                       |                       |                       |
|------------------------------------|-----------------------|-----------------------|-----------------------|
| <b>Sudan</b>                       | 2.72(2.40 - 3.04)     | -0.55(-0.70 to -0.41) | 0.68(0.61 - 0.74)     |
| <b>Suriname</b>                    | -0.27(-0.69 - 0.16)   | 0.58(0.35 - 0.81)     | 0.83(0.61 - 1.05)     |
| <b>Sweden</b>                      | -1.14(-1.26 to -1.02) | 0.05(-0.02 - 0.11)    | -1.15(-1.39 to -0.92) |
| <b>Switzerland</b>                 | 0.65(0.09 - 1.21)     | 0.23(-0.09 - 0.56)    | -2.05(-2.18 to -1.92) |
| <b>Syrian Arab Republic</b>        | 1.24(1.05 - 1.43)     | 0.26(0.15 - 0.37)     | 0.12(-0.01 - 0.26)    |
| <b>Taiwan (Province of China)</b>  | 3.80(3.14 - 4.46)     | -0.06(-0.23 - 0.11)   | 1.23(1.15 - 1.32)     |
| <b>Tajikistan</b>                  | 0.87(0.57 - 1.16)     | 1.10(0.98 - 1.23)     | 1.27(1.18 - 1.37)     |
| <b>Thailand</b>                    | -0.08(-0.41 - 0.24)   | -2.73(-3.06 to -2.40) | -0.73(-0.86 to -0.61) |
| <b>Timor-Leste</b>                 | 2.15(1.92 - 2.39)     | 0.42(0.19 - 0.65)     | 1.83(1.69 - 1.96)     |
| <b>Togo</b>                        | 0.63(0.55 - 0.71)     | -2.19(-2.36 to -2.02) | 1.96(1.81 - 2.11)     |
| <b>Tokelau</b>                     | 0.80(0.71 - 0.89)     | 0.18(0.16 - 0.20)     | 0.29(0.24 - 0.34)     |
| <b>Tonga</b>                       | 0.64(0.18 - 1.11)     | 0.65(0.50 - 0.80)     | 0.15(-0.02 - 0.32)    |
| <b>Trinidad and Tobago</b>         | -2.35(-2.88 to -1.82) | -0.43(-0.79 to -0.07) | -0.56(-0.76 to -0.36) |
| <b>Tunisia</b>                     | 1.44(1.40 - 1.48)     | -0.43(-0.54 to -0.33) | 0.25(0.19 - 0.30)     |
| <b>Turkey</b>                      | 0.58(0.50 - 0.66)     | -0.18(-0.35 to -0.02) | -0.15(-0.66 - 0.37)   |
| <b>Turkmenistan</b>                | 3.61(3.18 - 4.05)     | 1.34(1.12 - 1.56)     | 0.09(0.01 - 0.18)     |
| <b>Tuvalu</b>                      | 0.21(0.07 - 0.35)     | 0.20(0.17 - 0.24)     | 0.03(-0.05 - 0.11)    |
| <b>Uganda</b>                      | 3.16(2.90 - 3.42)     | 0.11(0.03 - 0.20)     | 1.05(0.88 - 1.21)     |
| <b>Ukraine</b>                     | 0.92(0.70 - 1.13)     | 0.14(-0.08 - 0.36)    | -0.18(-0.39 - 0.04)   |
| <b>United Arab Emirates</b>        | 1.63(1.31 - 1.95)     | -1.18(-1.63 to -0.73) | -0.39(-0.69 to -0.08) |
| <b>United Kingdom</b>              | 0.39(0.32 - 0.45)     | -1.06(-1.22 to -0.90) | -0.80(-0.89 to -0.70) |
| <b>United Republic of Tanzania</b> | 1.89(1.78 - 2.01)     | -0.47(-0.54 to -0.39) | 0.10(0.07 - 0.13)     |

|                                           |                       |                       |                       |
|-------------------------------------------|-----------------------|-----------------------|-----------------------|
| <b>United States of America</b>           | -0.32(-0.39 to -0.25) | 0.17(0.14 - 0.19)     | -1.78(-1.94 to -1.62) |
| <b>United States Virgin Islands</b>       | 1.22(0.92 - 1.51)     | 1.54(1.19 - 1.89)     | 1.15(0.95 - 1.36)     |
| <b>Uruguay</b>                            | -0.02(-0.16 - 0.12)   | -0.81(-0.91 to -0.72) | -0.11(-0.41 - 0.20)   |
| <b>Uzbekistan</b>                         | 3.01(2.81 - 3.20)     | 1.82(1.50 - 2.14)     | 1.83(1.47 - 2.19)     |
| <b>Vanuatu</b>                            | 0.53(0.42 - 0.64)     | 1.04(0.92 - 1.15)     | 0.63(0.58 - 0.69)     |
| <b>Venezuela (Bolivarian Republic of)</b> | 0.16(-0.20 - 0.52)    | -0.02(-0.18 - 0.15)   | 0.60(0.16 - 1.05)     |
| <b>Viet Nam</b>                           | 2.05(1.96 - 2.15)     | 0.68(0.63 - 0.74)     | 0.87(0.83 - 0.91)     |
| <b>Yemen</b>                              | 1.64(1.52 - 1.76)     | 0.16(0.08 - 0.24)     | 0.86(0.77 - 0.95)     |
| <b>Zambia</b>                             | 1.33(1.27 - 1.38)     | -0.47(-0.52 to -0.41) | 0.17(0.07 - 0.27)     |
| <b>Zimbabwe</b>                           | 1.12(0.70 - 1.54)     | 0.54(0.32 - 0.76)     | 0.73(0.38 - 1.08)     |

*ASMR* age-standardized mortality rate; *EAPC* estimated annual percentage change; *CI* confidence interval

**Table S8** EAPC of ASDR for genitourinary cancers in 204 countries and territories from 1990 to 2019

| Location            | EAPC (95% CI)         |                       |                       |
|---------------------|-----------------------|-----------------------|-----------------------|
|                     | Kidney cancer         | Bladder cancer        | Prostate cancer       |
| Afghanistan         | 0.62(0.41 - 0.84)     | -0.52(-0.54 to -0.49) | 0.23(0.18 - 0.29)     |
| Albania             | 2.13(1.80 - 2.46)     | -0.30(-0.47 to -0.14) | -0.10(-0.23 - 0.03)   |
| Algeria             | 0.66(0.57 - 0.76)     | -0.75(-1.03 to -0.48) | -0.67(-0.72 to -0.62) |
| American Samoa      | 0.03(-0.32 - 0.39)    | 1.63(1.33 - 1.93)     | 0.23(0.10 - 0.35)     |
| Andorra             | 0.07(-0.01 - 0.15)    | -0.93(-0.98 to -0.88) | -0.45(-0.48 to -0.42) |
| Angola              | 0.86(0.78 - 0.95)     | -0.42(-0.46 to -0.37) | 0.61(0.58 - 0.65)     |
| Antigua and Barbuda | -0.66(-1.07 to -0.24) | 0.39(0.17 - 0.61)     | 0.01(-0.33 - 0.35)    |
| Argentina           | -0.75(-1.05 to -0.45) | -1.14(-1.24 to -1.04) | -0.28(-0.53 to -0.02) |
| Armenia             | 5.22(4.37 - 6.09)     | -0.22(-0.46 - 0.02)   | 1.58(1.46 - 1.70)     |
| Australia           | -0.65(-0.73 to -0.56) | -1.43(-1.56 to -1.29) | -1.27(-1.44 to -1.10) |
| Austria             | -1.73(-1.85 to -1.61) | -1.11(-1.20 to -1.03) | -1.28(-1.43 to -1.14) |
| Azerbaijan          | -0.11(-0.38 - 0.17)   | 0.22(0.13 - 0.31)     | 0.61(0.51 - 0.71)     |
| Bahamas             | -0.74(-1.00 to -0.47) | 0.10(-0.04 - 0.23)    | -0.02(-0.13 - 0.09)   |
| Bahrain             | -1.14(-1.56 to -0.72) | -2.31(-2.53 to -2.09) | -0.67(-0.92 to -0.42) |
| Bangladesh          | 0.46(0.38 - 0.54)     | -0.48(-0.61 to -0.35) | -0.60(-0.74 to -0.47) |
| Barbados            | -1.01(-1.34 to -0.67) | 0.27(0.18 - 0.36)     | -0.01(-0.31 - 0.29)   |
| Belarus             | 3.55(2.58 - 4.52)     | -1.59(-2.05 to -1.13) | 0.86(0.68 - 1.04)     |
| Belgium             | -0.38(-0.61 to -0.15) | -1.34(-1.58 to -1.10) | -1.86(-2.03 to -1.69) |

---

|                                         |                       |                       |                       |
|-----------------------------------------|-----------------------|-----------------------|-----------------------|
| <b>Belize</b>                           | -0.32(-0.44 to -0.19) | 0.91(0.55 - 1.26)     | 0.82(0.27 - 1.38)     |
| <b>Benin</b>                            | 1.49(1.33 - 1.65)     | -1.89(-2.02 to -1.75) | 1.69(1.53 - 1.86)     |
| <b>Bermuda</b>                          | -2.03(-2.46 to -1.60) | -1.06(-1.27 to -0.85) | -0.26(-0.34 to -0.19) |
| <b>Bhutan</b>                           | 1.83(1.75 - 1.91)     | 0.40(0.36 - 0.45)     | 0.91(0.85 - 0.97)     |
| <b>Bolivia (Plurinational State of)</b> | 1.07(1.01 - 1.12)     | -0.13(-0.23 to -0.03) | 0.69(0.64 - 0.75)     |
| <b>Bosnia and Herzegovina</b>           | 2.04(1.81 - 2.27)     | 1.32(1.13 - 1.51)     | 1.26(1.05 - 1.48)     |
| <b>Botswana</b>                         | 1.51(1.08 - 1.93)     | -0.32(-0.64 to -0.01) | 0.11(-0.35 - 0.58)    |
| <b>Brazil</b>                           | 0.78(0.69 - 0.87)     | -0.52(-0.57 to -0.48) | -0.29(-0.54 to -0.04) |
| <b>Brunei Darussalam</b>                | 1.45(1.21 - 1.68)     | -0.45(-0.63 to -0.27) | 1.52(1.13 - 1.91)     |
| <b>Bulgaria</b>                         | 5.71(4.80 - 6.62)     | 2.06(1.67 - 2.45)     | 2.03(1.74 - 2.33)     |
| <b>Burkina Faso</b>                     | 1.45(1.32 - 1.58)     | -2.15(-2.42 to -1.87) | 1.84(1.75 - 1.93)     |
| <b>Burundi</b>                          | 0.04(-0.04 - 0.12)    | -1.76(-1.90 to -1.62) | -0.32(-0.38 to -0.27) |
| <b>Cabo Verde</b>                       | 4.53(3.76 - 5.31)     | 3.01(2.22 - 3.80)     | 2.45(1.65 - 3.26)     |
| <b>Cambodia</b>                         | 1.18(1.13 - 1.24)     | -0.31(-0.49 to -0.13) | 1.05(0.98 - 1.12)     |
| <b>Cameroon</b>                         | 0.87(0.82 - 0.92)     | -1.03(-1.14 to -0.91) | 1.85(1.69 - 2.00)     |
| <b>Canada</b>                           | 0.69(0.46 - 0.91)     | -1.36(-1.47 to -1.26) | -2.35(-2.61 to -2.08) |
| <b>Central African Republic</b>         | 0.22(0.12 - 0.32)     | -0.95(-1.01 to -0.90) | -0.05(-0.09 - 0.01)   |
| <b>Chad</b>                             | 1.30(1.23 - 1.37)     | -0.58(-0.71 to -0.44) | 2.20(1.99 - 2.40)     |
| <b>Chile</b>                            | 0.29(0.15 - 0.44)     | -0.10(-0.18 to -0.03) | 0.13(-0.07 - 0.34)    |
| <b>China</b>                            | 2.28(1.85 - 2.71)     | -0.58(-0.64 to -0.53) | -0.24(-0.27 to -0.20) |
| <b>Colombia</b>                         | 0.66(0.56 - 0.76)     | -1.74(-1.87 to -1.60) | -1.12(-1.36 to -0.89) |
| <b>Comoros</b>                          | 0.94(0.79 - 1.08)     | -0.53(-0.69 to -0.37) | 0.06(-0.04 - 0.15)    |

---

---

|                                              |                       |                       |                       |
|----------------------------------------------|-----------------------|-----------------------|-----------------------|
| <b>Congo</b>                                 | 0.18(0.01 - 0.36)     | -0.80(-1.01 to -0.59) | -0.21(-0.37 to -0.05) |
| <b>Cook Islands</b>                          | 0.18(0.07 - 0.29)     | -0.15(-0.33 - 0.03)   | -0.85(-0.90 to -0.80) |
| <b>Costa Rica</b>                            | 1.86(1.63 - 2.09)     | -0.59(-0.74 to -0.44) | 0.82(0.55 - 1.08)     |
| <b>Croatia</b>                               | 3.37(2.74 - 3.99)     | 0.22(0.11 - 0.34)     | 0.24(0.08 - 0.39)     |
| <b>Cuba</b>                                  | -1.16(-1.63 to -0.69) | 0.55(0.41 - 0.69)     | 0.79(0.72 - 0.86)     |
| <b>Cyprus</b>                                | 2.58(2.27 - 2.89)     | -0.15(-0.31 - 0.01)   | 0.19(-0.10 - 0.48)    |
| <b>Czechia</b>                               | 0.09(-0.34 - 0.52)    | -0.78(-0.87 to -0.69) | -0.19(-0.46 - 0.09)   |
| <b>Cote d'Ivoire</b>                         | 0.80(0.71 - 0.89)     | -1.83(-1.99 to -1.66) | 1.52(1.38 - 1.66)     |
| <b>Democratic People's Republic of Korea</b> | 0.39(0.31 - 0.48)     | -0.38(-0.43 to -0.34) | 0.16(0.07 - 0.24)     |
| <b>Democratic Republic of the Congo</b>      | -0.38(-0.65 to -0.10) | -1.21(-1.40 to -1.03) | 0.10(0.06 - 0.15)     |
| <b>Denmark</b>                               | 0.38(-0.17 - 0.93)    | -1.19(-1.63 to -0.75) | -0.47(-0.69 to -0.24) |
| <b>Djibouti</b>                              | 2.09(1.96 - 2.21)     | 0.12(0.08 - 0.17)     | 0.42(0.37 - 0.47)     |
| <b>Dominica</b>                              | -0.09(-0.42 - 0.25)   | 0.60(0.48 - 0.72)     | 0.52(0.38 - 0.65)     |
| <b>Dominican Republic</b>                    | 1.66(1.05 - 2.27)     | 1.47(1.28 - 1.67)     | 1.50(1.01 - 2.00)     |
| <b>Ecuador</b>                               | 1.53(1.14 - 1.92)     | 0.28(0.01 - 0.56)     | 0.60(0.40 - 0.80)     |
| <b>Egypt</b>                                 | 1.46(1.35 - 1.56)     | 0.14(0.07 - 0.21)     | 0.35(0.23 - 0.47)     |
| <b>El Salvador</b>                           | 0.97(0.85 - 1.10)     | 0.16(0.04 - 0.28)     | 0.88(0.47 - 1.28)     |
| <b>Equatorial Guinea</b>                     | 3.29(3.08 - 3.51)     | 0.55(0.35 - 0.75)     | 0.94(0.81 - 1.06)     |
| <b>Eritrea</b>                               | 1.54(1.26 - 1.83)     | -0.07(-0.27 - 0.14)   | -0.05(-0.29 - 0.19)   |
| <b>Estonia</b>                               | 3.02(2.25 - 3.79)     | -0.51(-0.69 to -0.34) | 1.46(1.22 - 1.71)     |
| <b>Eswatini</b>                              | 1.56(0.85 - 2.26)     | 0.38(0.09 - 0.66)     | 0.86(0.58 - 1.15)     |
| <b>Ethiopia</b>                              | 0.02(-0.24 - 0.29)    | -0.98(-1.10 to -0.87) | 0.52(0.40 - 0.63)     |

---

---

|                      |                       |                       |                       |
|----------------------|-----------------------|-----------------------|-----------------------|
| <b>Fiji</b>          | 0.50(0.38 - 0.62)     | 1.16(0.87 - 1.46)     | 0.60(0.43 - 0.77)     |
| <b>Finland</b>       | -0.65(-0.72 to -0.57) | -1.67(-1.76 to -1.58) | -1.06(-1.25 to -0.87) |
| <b>France</b>        | -0.41(-0.51 to -0.32) | -0.99(-1.03 to -0.96) | -1.98(-2.19 to -1.77) |
| <b>Gabon</b>         | 1.33(1.23 - 1.43)     | -0.49(-0.57 to -0.42) | 0.46(0.41 - 0.50)     |
| <b>Gambia</b>        | 1.07(0.86 - 1.27)     | 0.43(0.28 - 0.59)     | 0.71(0.59 - 0.82)     |
| <b>Georgia</b>       | 1.83(1.39 - 2.27)     | 2.00(1.66 - 2.35)     | 2.67(2.07 - 3.27)     |
| <b>Germany</b>       | -0.69(-0.80 to -0.57) | -1.44(-1.70 to -1.18) | -0.89(-1.03 to -0.75) |
| <b>Ghana</b>         | -0.70(-1.09 to -0.30) | -1.14(-1.31 to -0.96) | -0.33(-0.52 to -0.15) |
| <b>Greece</b>        | -0.03(-0.15 - 0.10)   | -0.97(-1.10 to -0.84) | -0.96(-1.20 to -0.73) |
| <b>Greenland</b>     | 1.08(0.74 - 1.43)     | -1.27(-1.37 to -1.17) | -0.05(-0.13 - 0.02)   |
| <b>Grenada</b>       | -0.05(-0.55 - 0.45)   | 0.65(0.50 - 0.81)     | 0.87(0.15 - 1.58)     |
| <b>Guam</b>          | -0.69(-1.01 to -0.37) | 0.64(0.39 - 0.90)     | -0.64(-0.93 to -0.34) |
| <b>Guatemala</b>     | 1.38(0.82 - 1.94)     | -0.49(-0.61 to -0.38) | 1.52(0.91 - 2.15)     |
| <b>Guinea</b>        | 0.92(0.83 - 1.01)     | 0.51(0.42 - 0.60)     | 1.00(0.85 - 1.15)     |
| <b>Guinea-Bissau</b> | 0.30(0.15 - 0.45)     | -1.42(-1.51 to -1.32) | 1.80(1.65 - 1.94)     |
| <b>Guyana</b>        | -0.31(-0.57 to -0.05) | 0.28(0.20 - 0.36)     | 0.20(0.06 - 0.35)     |
| <b>Haiti</b>         | -0.60(-0.92 to -0.27) | -0.29(-0.43 to -0.14) | 0.14(0.10 - 0.18)     |
| <b>Honduras</b>      | 1.90(1.78 - 2.02)     | 1.51(1.33 - 1.68)     | 1.73(1.40 - 2.05)     |
| <b>Hungary</b>       | -0.36(-0.65 to -0.07) | -0.06(-0.24 - 0.13)   | -0.69(-0.88 to -0.51) |
| <b>Iceland</b>       | -0.25(-0.45 to -0.05) | -1.52(-1.64 to -1.40) | -1.07(-1.30 to -0.85) |
| <b>India</b>         | 1.26(1.18 - 1.34)     | -0.22(-0.31 to -0.13) | -0.30(-0.38 to -0.22) |
| <b>Indonesia</b>     | 1.98(1.92 - 2.03)     | 0.31(0.25 - 0.36)     | 1.75(1.67 - 1.82)     |

---

---

|                                         |                       |                       |                       |
|-----------------------------------------|-----------------------|-----------------------|-----------------------|
| <b>Iran (Islamic Republic of)</b>       | 0.92(0.76 - 1.07)     | 0.11(0.05 - 0.18)     | 0.53(0.34 - 0.73)     |
| <b>Iraq</b>                             | 1.39(1.17 - 1.62)     | 0.77(0.56 - 0.98)     | 0.59(0.45 - 0.74)     |
| <b>Ireland</b>                          | 0.48(0.23 - 0.74)     | -0.81(-0.98 to -0.63) | -1.21(-1.45 to -0.97) |
| <b>Israel</b>                           | -0.40(-0.68 to -0.11) | -0.53(-0.73 to -0.33) | -1.54(-1.82 to -1.26) |
| <b>Italy</b>                            | -0.56(-0.60 to -0.52) | -1.57(-1.65 to -1.49) | -1.07(-1.25 to -0.89) |
| <b>Jamaica</b>                          | -0.96(-1.43 to -0.49) | -0.19(-0.49 - 0.11)   | 1.98(1.41 - 2.56)     |
| <b>Japan</b>                            | -0.02(-0.15 - 0.11)   | -0.64(-0.70 to -0.59) | -0.33(-0.44 to -0.23) |
| <b>Jordan</b>                           | 2.06(1.88 - 2.24)     | -0.51(-0.60 to -0.41) | 0.23(0.04 - 0.42)     |
| <b>Kazakhstan</b>                       | -0.20(-0.67 - 0.28)   | -0.78(-1.26 to -0.29) | 0.62(0.47 - 0.77)     |
| <b>Kenya</b>                            | 2.68(2.46 - 2.90)     | 1.39(1.19 - 1.59)     | 1.94(1.73 - 2.16)     |
| <b>Kiribati</b>                         | 0.12(-0.13 - 0.37)    | -0.28(-0.32 to -0.24) | -0.62(-0.82 to -0.42) |
| <b>Kuwait</b>                           | -0.28(-0.81 - 0.25)   | -0.41(-0.76 to -0.06) | 0.79(0.50 - 1.09)     |
| <b>Kyrgyzstan</b>                       | 0.97(0.49 - 1.46)     | -0.76(-1.10 to -0.42) | -1.36(-1.59 to -1.12) |
| <b>Lao People's Democratic Republic</b> | 0.59(0.57 - 0.62)     | -1.11(-1.26 to -0.95) | 0.23(0.18 - 0.28)     |
| <b>Latvia</b>                           | 3.04(2.34 - 3.74)     | 0.33(0.08 - 0.59)     | 1.73(1.36 - 2.09)     |
| <b>Lebanon</b>                          | 2.53(2.27 - 2.78)     | -0.43(-0.48 to -0.37) | 0.93(0.79 - 1.06)     |
| <b>Lesotho</b>                          | 3.05(2.85 - 3.25)     | 1.51(1.32 - 1.71)     | 1.36(1.11 - 1.62)     |
| <b>Liberia</b>                          | 0.51(-0.16 - 1.17)    | -1.99(-2.10 to -1.88) | 1.67(1.50 - 1.84)     |
| <b>Libya</b>                            | 1.29(1.16 - 1.43)     | 0.14(0.03 - 0.26)     | 0.33(0.25 - 0.41)     |
| <b>Lithuania</b>                        | 3.01(2.28 - 3.75)     | -0.81(-1.06 to -0.57) | 1.92(1.38 - 2.47)     |
| <b>Luxembourg</b>                       | -1.16(-1.25 to -1.08) | -1.27(-1.33 to -1.21) | -2.04(-2.14 to -1.94) |
| <b>Madagascar</b>                       | 0.56(0.48 - 0.64)     | -1.22(-1.38 to -1.05) | -0.36(-0.50 to -0.21) |

---

---

|                                         |                       |                       |                       |
|-----------------------------------------|-----------------------|-----------------------|-----------------------|
| <b>Malawi</b>                           | 0.77(0.67 - 0.87)     | -0.29(-0.40 to -0.18) | 0.95(0.82 - 1.08)     |
| <b>Malaysia</b>                         | 1.51(1.41 - 1.60)     | -0.55(-0.81 to -0.30) | 0.08(-0.07 - 0.24)    |
| <b>Maldives</b>                         | 0.40(0.14 - 0.67)     | -1.74(-1.88 to -1.59) | -0.06(-0.14 - 0.01)   |
| <b>Mali</b>                             | 1.33(1.20 - 1.46)     | -0.24(-0.31 to -0.17) | 0.66(0.62 - 0.71)     |
| <b>Malta</b>                            | 0.27(0.13 - 0.42)     | -1.46(-1.54 to -1.39) | -1.24(-1.40 to -1.09) |
| <b>Marshall Islands</b>                 | 0.63(0.49 - 0.78)     | 0.58(0.46 - 0.70)     | -0.07(-0.31 - 0.16)   |
| <b>Mauritania</b>                       | 0.17(0.10 - 0.24)     | -2.17(-2.27 to -2.07) | 1.32(1.16 - 1.48)     |
| <b>Mauritius</b>                        | 1.70(1.45 - 1.95)     | -1.78(-2.05 to -1.52) | 0.18(-0.13 - 0.50)    |
| <b>Mexico</b>                           | 0.93(0.87 - 1.00)     | -0.22(-0.3 to -0.14)  | -0.11(-0.22 - 0.01)   |
| <b>Micronesia (Federated States of)</b> | 0.23(0.08 - 0.38)     | 0.56(0.52 - 0.61)     | 0.48(0.39 - 0.57)     |
| <b>Monaco</b>                           | 0.66(0.51 - 0.82)     | 0.51(0.46 - 0.56)     | -0.24(-0.30 to -0.17) |
| <b>Mongolia</b>                         | 3.01(2.71 - 3.30)     | -3.22(-3.70 to -2.75) | -0.06(-0.20 - 0.08)   |
| <b>Montenegro</b>                       | 1.03(0.96 - 1.10)     | 0.34(0.25 - 0.43)     | 0.78(0.71 - 0.84)     |
| <b>Morocco</b>                          | 1.52(1.36 - 1.69)     | 0.49(0.28 - 0.71)     | 0.67(0.34 - 0.99)     |
| <b>Mozambique</b>                       | 2.32(2.16 - 2.49)     | -0.02(-0.15 - 0.10)   | 1.26(1.19 - 1.32)     |
| <b>Myanmar</b>                          | 1.26(1.15 - 1.37)     | -0.99(-1.04 to -0.93) | 0.62(0.60 - 0.65)     |
| <b>Namibia</b>                          | 1.65(1.43 - 1.88)     | 0.12(-0.10 - 0.34)    | 2.00(1.86 - 2.13)     |
| <b>Nauru</b>                            | -0.38(-0.57 to -0.19) | 0.28(0.12 - 0.44)     | 0.53(0.38 - 0.69)     |
| <b>Nepal</b>                            | 2.08(1.81 - 2.34)     | 0.21(0.07 - 0.36)     | 0.84(0.69 - 1.00)     |
| <b>Netherlands</b>                      | -0.07(-0.22 - 0.08)   | -0.63(-0.78 to -0.49) | -0.85(-1.01 to -0.68) |
| <b>New Zealand</b>                      | -0.09(-0.23 - 0.06)   | -1.72(-1.90 to -1.53) | -1.60(-1.76 to -1.43) |
| <b>Nicaragua</b>                        | 1.50(1.30 - 1.70)     | -0.14(-0.41 - 0.13)   | 0.65(0.47 - 0.83)     |

---



---

|                                 |                       |                       |                       |
|---------------------------------|-----------------------|-----------------------|-----------------------|
| <b>Niger</b>                    | -0.52(-0.66 to -0.38) | -1.81(-1.96 to -1.65) | 1.97(1.82 - 2.12)     |
| <b>Nigeria</b>                  | 0.62(0.50 - 0.75)     | 0.52(0.41 - 0.63)     | 1.09(0.97 - 1.21)     |
| <b>Niue</b>                     | 0.67(0.43 - 0.91)     | 0.26(0.20 - 0.32)     | 0.61(0.56 - 0.66)     |
| <b>North Macedonia</b>          | 3.97(3.46 - 4.48)     | 0.48(0.29 - 0.68)     | 1.41(1.24 - 1.57)     |
| <b>Northern Mariana Islands</b> | -0.31(-0.78 - 0.17)   | 3.37(2.73 - 4.02)     | 1.22(1.00 - 1.43)     |
| <b>Norway</b>                   | 0.01(-0.18 - 0.21)    | -1.37(-1.44 to -1.30) | -0.89(-1.08 to -0.70) |
| <b>Oman</b>                     | 2.44(2.06 - 2.82)     | 0.35(0.11 - 0.59)     | 0.40(0.28 - 0.52)     |
| <b>Pakistan</b>                 | 2.03(1.80 - 2.27)     | 0.50(0.36 - 0.64)     | 0.58(0.43 - 0.72)     |
| <b>Palau</b>                    | 0.67(0.46 - 0.88)     | 0.07(0.01 - 0.13)     | -0.09(-0.16 to -0.02) |
| <b>Palestine</b>                | 1.00(0.81 - 1.20)     | -0.38(-0.44 to -0.32) | -0.18(-0.29 to -0.07) |
| <b>Panama</b>                   | 2.58(2.36 - 2.81)     | -1.23(-1.40 to -1.07) | 0.38(0.01 - 0.78)     |
| <b>Papua New Guinea</b>         | 0.56(0.46 - 0.67)     | 0.90(0.84 - 0.96)     | 0.99(0.93 - 1.04)     |
| <b>Paraguay</b>                 | 0.13(-0.02 - 0.29)    | 0.61(0.49 - 0.73)     | 1.21(0.84 - 1.59)     |
| <b>Peru</b>                     | -0.52(-0.81 to -0.23) | -0.83(-0.99 to -0.68) | 0.19(0.06 - 0.33)     |
| <b>Philippines</b>              | 0.57(0.39 - 0.75)     | -0.75(-0.97 to -0.53) | -0.20(-0.39 to -0.01) |
| <b>Poland</b>                   | 3.25(2.29 - 4.22)     | 0.25(0.10 - 0.40)     | 0.53(0.27 - 0.80)     |
| <b>Portugal</b>                 | -0.44(-0.65 to -0.23) | -0.31(-0.37 to -0.25) | -1.38(-1.57 to -1.19) |
| <b>Puerto Rico</b>              | -0.31(-0.52 to -0.10) | -0.31(-0.46 to -0.16) | -1.20(-1.32 to -1.08) |
| <b>Qatar</b>                    | 0.22(-0.12 - 0.57)    | 1.32(1.06 - 1.58)     | 0.78(0.47 - 1.09)     |
| <b>Republic of Korea</b>        | 1.22(0.64 - 1.82)     | -1.62(-1.82 to -1.41) | 0.12(-0.05 - 0.30)    |
| <b>Republic of Moldova</b>      | 1.70(1.34 - 2.05)     | -0.27(-0.55 - 0.01)   | 1.82(1.35 - 2.30)     |
| <b>Romania</b>                  | 1.61(1.52 - 1.69)     | 0.45(0.32 - 0.58)     | 1.00(0.89 - 1.11)     |

---

---

|                                         |                       |                       |                       |
|-----------------------------------------|-----------------------|-----------------------|-----------------------|
| <b>Russian Federation</b>               | -0.25(-0.52 - 0.02)   | -0.89(-1.28 to -0.50) | 1.52(1.38 - 1.66)     |
| <b>Rwanda</b>                           | 0.18(-0.05 - 0.40)    | -1.96(-2.23 to -1.68) | -0.40(-0.65 to -0.15) |
| <b>Saint Kitts and Nevis</b>            | -1.90(-2.45 to -1.34) | -0.40(-0.59 to -0.22) | 0.38(0.23 - 0.54)     |
| <b>Saint Lucia</b>                      | -1.24(-1.66 to -0.81) | -0.55(-0.80 to -0.30) | -0.49(-0.69 to -0.29) |
| <b>Saint Vincent and the Grenadines</b> | -1.02(-1.47 to -0.56) | 0.45(0.23 - 0.67)     | 0.26(0.04 - 0.49)     |
| <b>Samoa</b>                            | -0.37(-0.50 to -0.25) | 0.01(-0.04 - 0.06)    | -0.66(-0.85 to -0.47) |
| <b>San Marino</b>                       | 0.64(0.56 - 0.72)     | -0.09(-0.16 to -0.02) | -0.36(-0.40 to -0.32) |
| <b>Sao Tome and Principe</b>            | 0.13(-0.32 - 0.58)    | 1.06(0.98 - 1.13)     | 1.45(1.35 - 1.56)     |
| <b>Saudi Arabia</b>                     | 2.48(2.26 - 2.70)     | -0.92(-1.21 to -0.62) | -0.86(-1.08 to -0.63) |
| <b>Senegal</b>                          | 0.44(0.20 - 0.67)     | -1.36(-1.48 to -1.24) | 1.98(1.79 - 2.18)     |
| <b>Serbia</b>                           | 1.06(0.92 - 1.20)     | 0.47(0.38 - 0.55)     | 1.21(0.99 - 1.44)     |
| <b>Seychelles</b>                       | 0.64(0.18 - 1.10)     | -0.07(-0.26 - 0.13)   | 0.97(0.65 - 1.29)     |
| <b>Sierra Leone</b>                     | 0.68(0.47 - 0.90)     | -2.17(-2.34 to -2.00) | 1.86(1.69 - 2.03)     |
| <b>Singapore</b>                        | -0.13(-0.27 - 0.01)   | -2.50(-2.72 to -2.29) | -0.56(-0.70 to -0.42) |
| <b>Slovakia</b>                         | 1.46(1.11 - 1.82)     | -0.20(-0.45 - 0.04)   | 0.63(0.49 - 0.77)     |
| <b>Slovenia</b>                         | 1.52(1.18 - 1.86)     | -0.52(-0.72 to -0.32) | 0.64(0.33 - 0.95)     |
| <b>Solomon Islands</b>                  | 0.56(0.31 - 0.80)     | 0.75(0.68 - 0.82)     | 0.56(0.50 - 0.61)     |
| <b>Somalia</b>                          | 0.67(0.58 - 0.77)     | -0.42(-0.45 to -0.39) | -0.10(-0.15 to -0.04) |
| <b>South Africa</b>                     | 0.30(0.13 - 0.46)     | -0.38(-0.64 to -0.11) | 0.63(0.39 - 0.87)     |
| <b>South Sudan</b>                      | 0.49(0.38 - 0.61)     | -0.48(-0.56 to -0.41) | -0.12(-0.15 to -0.09) |
| <b>Spain</b>                            | 0.46(0.40 - 0.51)     | -0.94(-1.04 to -0.84) | -1.52(-1.67 to -1.37) |
| <b>Sri Lanka</b>                        | -2.13(-3.12 to -1.12) | 1.24(0.99 - 1.48)     | 0.20(0.07 - 0.32)     |

---

---

|                                    |                       |                       |                       |
|------------------------------------|-----------------------|-----------------------|-----------------------|
| <b>Sudan</b>                       | 2.34(2.03 - 2.65)     | -0.62(-0.76 to -0.47) | 0.62(0.56 - 0.69)     |
| <b>Suriname</b>                    | -0.43(-0.86 - 0.01)   | 0.58(0.36 - 0.79)     | 0.92(0.70 - 1.15)     |
| <b>Sweden</b>                      | -1.47(-1.60 to -1.35) | -0.15(-0.24 to -0.06) | -1.10(-1.33 to -0.87) |
| <b>Switzerland</b>                 | 0.25(-0.31 - 0.82)    | -0.07(-0.39 - 0.25)   | -1.98(-2.06 to -1.90) |
| <b>Syrian Arab Republic</b>        | 1.19(0.99 - 1.39)     | 0.11(0.02 - 0.20)     | 0.01(-0.16 - 0.16)    |
| <b>Taiwan (Province of China)</b>  | 3.40(2.76 - 4.05)     | -0.32(-0.49 to -0.16) | 1.26(1.17 - 1.36)     |
| <b>Tajikistan</b>                  | 0.36(0.02 - 0.71)     | 0.66(0.49 - 0.83)     | 0.73(0.61 - 0.86)     |
| <b>Thailand</b>                    | -0.30(-0.70 - 0.10)   | -3.02(-3.40 to -2.64) | -0.77(-0.92 to -0.63) |
| <b>Timor-Leste</b>                 | 1.70(1.42 - 1.98)     | 0.15(-0.11 - 0.42)    | 1.70(1.56 - 1.84)     |
| <b>Togo</b>                        | 0.48(0.39 - 0.58)     | -2.07(-2.25 to -1.90) | 1.89(1.75 - 2.04)     |
| <b>Tokelau</b>                     | 0.72(0.59 - 0.84)     | 0.20(0.17 - 0.23)     | 0.23(0.19 - 0.28)     |
| <b>Tonga</b>                       | 0.67(0.18 - 1.15)     | 0.71(0.56 - 0.85)     | 0.20(0.03 - 0.37)     |
| <b>Trinidad and Tobago</b>         | -2.32(-2.84 to -1.79) | -0.25(-0.59 - 0.09)   | -0.61(-0.81 to -0.42) |
| <b>Tunisia</b>                     | 1.29(1.26 - 1.32)     | -0.34(-0.44 to -0.24) | 0.34(0.30 - 0.38)     |
| <b>Turkey</b>                      | 0.20(0.14 - 0.25)     | -0.34(-0.54 to -0.14) | -0.24(-0.64 - 0.16)   |
| <b>Turkmenistan</b>                | 3.60(3.15 - 4.05)     | 1.89(1.64 - 2.13)     | 0.17(0.06 - 0.29)     |
| <b>Tuvalu</b>                      | 0.06(-0.07 - 0.18)    | 0.10(0.07 - 0.13)     | -0.12(-0.21 to -0.03) |
| <b>Uganda</b>                      | 2.97(2.71 - 3.23)     | 0.01(-0.12 - 0.13)    | 0.96(0.79 - 1.13)     |
| <b>Ukraine</b>                     | 0.92(0.68 - 1.15)     | 0.27(0.02 - 0.52)     | 0.07(-0.14 - 0.28)    |
| <b>United Arab Emirates</b>        | 1.52(1.28 - 1.77)     | -1.06(-1.45 to -0.67) | -0.33(-0.63 to -0.02) |
| <b>United Kingdom</b>              | -0.04(-0.12 - 0.04)   | -1.51(-1.68 to -1.35) | -0.82(-0.90 to -0.73) |
| <b>United Republic of Tanzania</b> | 1.81(1.67 - 1.95)     | -0.48(-0.55 to -0.41) | 0.08(0.04 - 0.11)     |

---

|                                           |                       |                       |                       |
|-------------------------------------------|-----------------------|-----------------------|-----------------------|
| <b>United States of America</b>           | -0.65(-0.73 to -0.57) | -0.14(-0.18 to -0.09) | -1.70(-1.86 to -1.55) |
| <b>United States Virgin Islands</b>       | 0.93(0.71 - 1.15)     | 1.60(1.22 - 1.98)     | 1.42(1.15 - 1.69)     |
| <b>Uruguay</b>                            | -0.31(-0.49 to -0.13) | -0.99(-1.11 to -0.88) | -0.12(-0.45 - 0.20)   |
| <b>Uzbekistan</b>                         | 2.60(2.43 - 2.77)     | 1.40(1.08 - 1.71)     | 1.40(1.12 - 1.67)     |
| <b>Vanuatu</b>                            | 0.68(0.56 - 0.80)     | 1.11(0.98 - 1.24)     | 0.59(0.54 - 0.64)     |
| <b>Venezuela (Bolivarian Republic of)</b> | 0.04(-0.34 - 0.41)    | -0.02(-0.18 - 0.13)   | 0.79(0.37 - 1.20)     |
| <b>Viet Nam</b>                           | 2.11(1.99 - 2.24)     | 0.72(0.66 - 0.78)     | 0.78(0.75 - 0.81)     |
| <b>Yemen</b>                              | 1.47(1.34 - 1.60)     | -0.03(-0.11 - 0.04)   | 0.85(0.75 - 0.94)     |
| <b>Zambia</b>                             | 1.15(1.11 - 1.19)     | -0.50(-0.57 to -0.43) | 0.18(0.06 - 0.31)     |
| <b>Zimbabwe</b>                           | 1.19(0.82 - 1.57)     | 0.63(0.41 - 0.86)     | 0.88(0.50 - 1.25)     |

*ASDR* age-standardized DALYs rate; *EAPC* estimated annual percentage change; *CI* confidence interval

**Table S9** Percentage of genitourinary cancers deaths and DALYs attributable to risk factors in 1990 and 2019

| Cancer                 | 1990                                       |                                 |                                 | 2019                                       |                                 |                                 |
|------------------------|--------------------------------------------|---------------------------------|---------------------------------|--------------------------------------------|---------------------------------|---------------------------------|
|                        | Leading risk                               | Percentage of death<br>(95% UI) | Percentage of DALYs<br>(95% UI) | Leading risk                               | Percentage of death<br>(95% UI) | Percentage of DALYs<br>(95% UI) |
| <b>Kidney cancer</b>   | Smoking                                    | 20.78(15.00 - 26.43)            | 18.19(13.10 - 23.03)            | High BMI                                   | 19.05(11.09 - 28.30)            | 18.55(10.92 - 27.37)            |
|                        | High BMI                                   | 15.53(8.52 - 23.90)             | 13.98(7.72 - 21.74)             | Smoking                                    | 18.09(12.81 - 23.44)            | 16.95(11.78 - 21.79)            |
|                        | Occupational exposure to trichloroethylene | 0.03(0.01 - 0.06)               | 0.04(0.01 - 0.07)               | Occupational exposure to trichloroethylene | 0.05(0.01 - 0.09)               | 0.06(0.01 - 0.11)               |
| <b>Bladder cancer</b>  | Smoking                                    | 41.05(32.07 - 49.14)            | 42.86(34.04 - 50.23)            | Smoking                                    | 33.89(25.88 - 41.80)            | 36.76(44.00 - 28.46)            |
|                        | High FPG                                   | 7.03(1.42 - 15.37)              | 6.24(1.23 - 13.77)              | High FPG                                   | 9.98(2.09 - 21.30)              | 9.11(19.59 - 1.87)              |
| <b>Prostate cancer</b> | Smoking                                    | 8.29(3.73 - 12.59)              | 8.82(3.99 - 13.38)              | Smoking                                    | 6.01(2.71 - 9.29)               | 6.60(3.02 - 10.10)              |

*BMI* body - mass index; *DALYs* disability - adjusted life - years; *FPG* fasting plasma glucose *UI* uncertainty interval
